# Supplementary material for: The Genomic Analysis of Lactic Acidosis and Acidosis Response in Human Cancers
Source: PLoS Genet. 2008 Dec 5;4(12):e1000293. doi: 10.1371/journal.pgen.1000293 (PMC2585811; doi:10.1371/journal.pgen.1000293)
Supplement: Table S1 — Estimated posterior probability and corresponding Bayesian p-value (1-probability) for gene probe sets showing responses to hypoxia, lactic acidosis and acidosis. (10.86 MB XLS) [file pgen.1000293.s009.xls]

## Sheet: pvs
	Lactic Acidosis	Lactic Acidosis		Hypoxia	Hypoxia		Acidosis	Acidosis
	probability	p value		probability	p value		probability	p value
1007_s_at	0.773635	0.00631912		0.553543	0.0113707		0.00714315	0.13037
1053_at	0.951402	0.0429471		0.0406947	0.0373151		0.715021	0.168502
117_at	0.0317265	0.997884		0.0800366	0.0148827		0.00727362	0.708744
121_at	0.0316344	0.188569		0.138216	0.00289113		0.0485534	0.0775227
1255_g_at	0.0429258	0.539277		0.240891	0.0835094		0.049055	0.237256
1294_at	0.0625376	0.0532099		0.0519541	0.00565543		0.722242	0.000348527
1316_at	0.0168655	0.758162		0.0788517	0.351418		0.0101525	0.586687
1320_at	0.0167923	0.610122		0.0396631	0.145273		0.0129636	0.242732
1405_i_at	0.188564	0.0374773		0.0843631	0.000941764		0.0378656	0.257493
1431_at	0.0387144	0.619878		0.807329	0.067723		0.00874126	0.720731
1438_at	0.969563	0.0236733		0.0420902	0.0638025		0.955094	0.0341324
1487_at	0.0142864	0.356518		0.217612	0.301574		0.0145277	0.00740122
1494_f_at	0.0320449	0.231878		0.0933003	0.0137044		0.0835271	0.222076
1552256_a_at	0.83401	0.00281557		0.184601	0.71337		0.0637354	0.0952072
1552257_a_at	0.0138615	0.556529		0.0304866	0.136574		0.0240615	0.603188
1552258_at	0.00502016	0.15612		0.854677	0.144588		0.492663	0.00229209
1552261_at	0.0129504	0.357932		0.0413062	0.00129793		0.305038	0.00146065
1552263_at	0.392486	0.0071134		0.633086	0.0793291		0.096352	0.0643035
1552264_a_at	0.0432229	0.143479		0.0637179	0.0554599		0.552717	0.676545
1552266_at	0.14247	0.131341		0.0764568	0.876653		0.0421283	0.143511
1552269_at	0.113776	0.122535		0.0849456	0.0135277		0.0299928	0.551267
1552271_at	0.1918	0.282958		0.11885	0.000836609		0.0291879	0.18066
1552272_a_at	0.238166	0.0975197		0.0670737	0.609529		0.0818522	0.962124
1552274_at	0.0243711	0.0185297		0.641915	0.0080853		0.0122354	0.885358
1552275_s_at	0.0508008	0.109599		0.288083	0.0332064		0.0786907	0.876781
1552276_a_at	0.0291282	0.709592		0.126926	0.0212301		0.046755	0.552269
1552277_a_at	0.0364231	0.0992455		0.0580462	0.264111		0.00820861	0.649405
1552278_a_at	0.0269409	0.764714		0.14732	0.292029		0.156565	0.00799915
1552279_a_at	0.0095252	0.447122		0.0434944	0.569677		0.431682	0.00458288
1552280_at	0.103827	0.317013		0.812121	0.0202753		0.0107823	0.94758
1552281_at	0.119097	0.494477		0.36402	0.0131158		0.0300097	0.330133
1552283_s_at	0.551796	0.0357592		0.0533033	0.892258		0.273623	0.0697311
1552286_at	0.0206827	0.793506		0.0600423	0.118119		0.124711	0.00701117
1552287_s_at	0.25165	0.0643455		0.13237	0.00561189		0.09391	0.0490257
1552288_at	0.00927593	0.895506		0.318539	0.122622		0.0227545	0.590871
1552289_a_at	0.128485	0.0818891		0.0464887	0.061994		0.0401869	0.171525
1552291_at	0.87624	0.000287376		0.141584	0.201784		0.0197205	0.32535
1552293_at	0.016279	0.661526		0.808601	0.0025194		0.0630951	0.0852453
1552295_a_at	0.790389	0.0115403		0.415434	0.284428		0.953388	0.0013144
1552296_at	0.101873	0.107482		0.156229	0.00067371		0.540036	0.020631
1552299_at	0.132553	0.356317		0.0397305	0.901265		0.0123184	0.82301
1552301_a_at	0.761902	0.00549631		0.10094	0.00883254		0.979737	4.2259e-06
1552302_at	0.176461	0.00408278		0.45017	0.111102		0.500499	0.00589914
1552303_a_at	0.0210449	0.0359018		0.0344898	0.0295484		0.323877	0.0263829
1552304_at	0.0570458	0.126072		0.0993669	0.82926		0.0254034	0.74549
1552306_at	0.0178442	0.598753		0.058346	0.152013		0.348009	0.0219091
1552307_a_at	0.297878	0.169501		0.140125	0.881219		0.0211543	0.134657
1552309_a_at	0.0283615	0.315081		0.0491195	0.0561642		0.744736	0.0199186
1552310_at	0.276641	0.0391102		0.572731	0.00138276		0.0883466	0.0817223
1552311_a_at	0.0173408	0.272903		0.472089	0.0109533		0.0381229	0.548326
1552312_a_at	0.0355093	0.34869		0.0754937	0.0273185		0.417808	1.93967e-05
1552314_a_at	0.0154491	0.767953		0.837001	0.0213953		0.419452	0.000563616
1552315_at	0.0194673	0.834283		0.914475	0.0118503		0.390088	0.00328462
1552316_a_at	0.0128097	0.339084		0.036033	0.226054		0.40977	0.00244802
1552318_at	0.0117228	0.363805		0.0361882	0.771977		0.0113916	0.434149
1552319_a_at	0.56012	0.0167971		0.0663806	0.0142791		0.295354	0.284647
1552320_a_at	0.0271061	0.319217		0.790241	0.0142564		0.00862115	0.752854
1552321_a_at	0.0204582	0.577523		0.0430838	0.25556		0.0123646	0.977202
1552322_at	0.420564	0.102793		0.0249878	0.991861		0.0610963	0.188331
1552323_s_at	0.0113601	0.0170943		0.127153	0.00447217		0.145703	0.146561
1552325_at	0.0232904	0.0241368		0.0322865	0.229222		0.0345137	0.365149
1552326_a_at	0.0321161	0.302845		0.611785	0.0296848		0.1681	0.0241106
1552327_at	0.0453264	0.498821		0.735737	0.0676533		0.0281358	0.994259
1552329_at	0.0389719	0.432421		0.0704623	0.0377585		0.0168236	0.381076
1552330_at	0.0183286	0.438052		0.1084	0.0229991		0.0895595	0.770121
1552332_at	0.0186143	0.588085		0.0689088	0.883231		0.0232406	0.138481
1552334_at	0.272196	0.0165311		0.319753	0.516287		0.541058	0.0141469
1552335_at	0.0450845	0.22184		0.385261	0.00408228		0.0444719	0.163035
1552337_s_at	0.0145964	0.965535		0.875686	0.0483806		0.0247867	0.317114
1552338_at	0.0486522	0.351587		0.0360838	0.227551		0.0154039	0.929836
1552340_at	0.00986331	0.84247		0.7043	0.0213665		0.028125	0.529038
1552343_s_at	0.0472607	0.507004		0.0727961	0.249101		0.248988	0.88697
1552344_s_at	0.0839223	0.0773807		0.0693904	0.0262628		0.287398	2.09954e-05
1552347_at	0.289604	0.166813		0.14024	0.254352		0.794342	0.00649643
1552348_at	0.198001	0.151477		0.133502	0.0475124		0.0559371	0.194942
1552349_a_at	0.0611183	0.624364		0.175406	0.064357		0.0134334	0.577246
1552354_at	0.0259728	0.761626		0.0249685	0.390059		0.0295014	0.230099
1552355_s_at	0.0193729	0.939716		0.111571	0.15669		0.0139273	0.617726
1552359_at	0.0128961	0.140851		0.0264145	0.130102		0.117269	0.24651
1552360_a_at	0.0690686	0.0341241		0.115579	0.0804263		0.0230152	0.206111
1552362_a_at	0.00864284	0.215779		0.0170874	0.0626052		0.0204826	0.488241
1552364_s_at	0.0420761	0.175463		0.0311996	0.0746676		0.0117027	0.215561
1552365_at	0.0183331	0.52758		0.226187	0.197638		0.0156564	0.44431
1552367_a_at	0.010951	0.461706		0.0726979	0.752769		0.0846522	0.0480484
1552368_at	0.0411164	0.175765		0.0292197	0.599761		0.0282949	0.23862
1552370_at	0.0140799	0.414652		0.070457	0.0634364		0.0320368	0.0208678
1552372_at	0.0144566	0.748548		0.033845	0.403109		0.0193204	0.211789
1552373_s_at	0.00731509	0.929935		0.0147749	0.929429		0.0160861	0.356287
1552375_at	0.0238423	0.863312		0.0361469	0.185851		0.0152561	0.815567
1552377_s_at	0.840676	0.0269825		0.18077	0.0164964		0.00682044	0.226671
1552378_s_at	0.0335456	0.166886		0.294818	0.240912		0.0733461	0.232764
1552379_at	0.00830456	0.11099		0.0133239	0.0858901		0.0189554	0.381049
1552381_at	0.0212851	0.494718		0.338189	0.0546859		0.0141757	0.785488
1552383_at	0.0380339	0.438777		0.345355	0.734616		0.0219763	0.771464
1552384_a_at	0.0131535	0.881393		0.0551564	0.0270655		0.0109489	0.624308
1552386_at	0.242333	0.0335868		0.0698227	0.326381		0.0124798	0.514445
1552388_at	0.0309745	0.778144		0.139841	0.0423235		0.00959499	0.585752
1552389_at	0.0222799	0.80381		0.10766	0.793564		0.0464443	0.0384023
1552390_a_at	0.236771	0.06709		0.0324821	0.897632		0.180512	0.00417472
1552391_at	0.131628	0.0532746		0.0801442	0.122373		0.0174781	0.917905
1552393_at	0.0180032	0.17808		0.0238579	0.121646		0.0203138	0.0518974
1552394_a_at	0.0192989	0.593737		0.129903	0.502175		0.0125521	0.835886
1552395_at	0.126222	0.11407		0.0591164	0.153498		0.0707743	0.100465
1552396_at	0.0316539	0.709113		0.135267	0.136595		0.00945711	0.784873
1552398_a_at	0.0128471	0.358168		0.0213448	0.101155		0.0240577	0.48469
1552399_a_at	0.380778	0.0918229		0.0635122	0.314611		0.00974087	0.130118
1552400_a_at	0.0576029	0.304009		0.195131	0.0178329		0.007883	0.922373
1552401_a_at	0.056448	0.900823		0.649849	0.0335485		0.0199296	0.407203
1552402_at	0.745559	0.241478		0.0316004	0.0421974		0.0137895	0.699436
1552405_at	0.0566468	0.985772		0.495348	0.00582725		0.0500892	0.113675
1552408_at	0.209672	0.206435		0.599876	1.23266e-05		0.146557	0.0937616
1552409_a_at	0.00870966	0.636088		0.977942	0.00384757		0.0145225	0.663429
1552410_at	0.0111467	0.328861		0.0212982	0.0674128		0.0174757	0.195394
1552411_at	0.0299669	0.69083		0.63888	0.00991044		0.0296332	0.713373
1552412_a_at	0.0113593	0.852661		0.450791	0.0748912		0.0235158	0.125917
1552414_at	0.0315653	0.611856		0.104665	0.0661399		0.038211	0.182435
1552415_a_at	0.0488264	0.548913		0.214919	0.0865728		0.0083848	0.619584
1552417_a_at	0.0429011	0.84672		0.0689194	0.180787		0.1324	0.0200611
1552418_at	0.02955	0.333818		0.402811	0.0839892		0.0147074	0.653675
1552419_s_at	0.0437503	0.222749		0.0921322	0.289545		0.0121153	0.707913
1552421_a_at	0.0588075	0.629807		0.160044	0.0243823		0.111932	0.0398413
1552422_at	0.0140788	0.914348		0.0545781	0.589665		0.0281486	0.197745
1552423_at	0.0221572	0.318734		0.038698	0.271695		0.0133622	0.501104
1552424_at	0.0213995	0.723071		0.0389511	0.956893		0.0227177	0.072676
1552425_a_at	0.0330231	0.333986		0.0873262	0.116221		0.0236241	0.128898
1552426_a_at	1	0.0014584		0.0712195	0.135259		0.0103162	0.679184
1552427_at	0.043488	0.86346		0.504424	0.0771709		0.143441	0.0189962
1552430_at	0.00506959	0.285251		0.0294552	0.068775		0.0458816	0.0435673
1552432_at	0.113852	0.215827		0.344276	0.0112224		0.00906507	0.790996
1552436_a_at	0.0349632	0.840519		0.328641	0.0178336		0.06138	0.112711
1552438_a_at	0.0293799	0.7234		0.360941	0.0155921		0.0153471	0.0810479
1552439_s_at	0.0429524	0.232768		0.0275712	0.894786		0.0153574	0.0945428
1552440_at	0.0117001	0.943357		0.0590284	0.36598		0.0551546	0.289411
1552445_a_at	0.0361704	0.115637		0.138922	0.0679727		0.0247333	0.629405
1552448_a_at	0.0127943	0.934238		0.838234	0.0365445		0.0145221	0.543337
1552449_a_at	0.0139326	0.982896		0.675637	0.0536112		0.0109815	0.246894
1552450_a_at	0.154241	0.10126		0.078371	0.00569804		0.00866016	0.860736
1552452_at	0.0277567	0.801603		0.16151	0.0547243		0.300793	0.0418617
1552453_a_at	0.0308498	0.602336		0.894166	0.017609		0.0134816	0.65344
1552455_at	0.0720141	0.0422779		0.437138	0.14005		0.0355725	0.890241
1552456_a_at	0.128346	0.0382994		0.0931032	0.00783237		0.0250046	0.544599
1552457_a_at	0.0579575	0.0964071		0.0547155	0.687319		0.0223708	0.272654
1552458_at	0.0273125	0.765982		0.0471482	0.0277648		0.0101069	0.632986
1552459_a_at	0.021808	0.457334		0.551598	0.00481452		0.0454797	0.0269621
1552461_at	0.0313706	0.206971		0.0678909	0.0658205		0.0253181	0.824139
1552463_at	0.0422496	0.193242		0.233389	0.0530685		0.260014	0.0353417
1552466_x_at	0.0764574	0.109946		0.037363	0.673744		0.0147991	0.0158931
1552467_at	0.0171702	0.843293		0.0248235	0.299573		0.0155984	0.690157
1552468_a_at	0.131475	0.112178		0.41851	0.00472273		0.0123919	0.857563
1552470_a_at	0.0314479	0.863114		0.174753	0.0429938		0.017416	0.457596
1552472_a_at	0.0618091	0.572802		0.46482	0.00162275		0.0478335	0.757949
1552473_at	0.0479007	0.269957		0.321604	0.174667		0.206015	0.16185
1552474_a_at	0.0105831	0.54686		0.0437553	0.0557934		0.21658	0.0185699
1552476_s_at	0.999642	0.00866526		0.0441278	0.164699		0.996165	0.000183447
1552477_a_at	1	5.93941e-05		0.394263	0.00487156		0.999998	4.79555e-06
1552478_a_at	1	1.98198e-05		0.571547	0.0431422		1	4.30691e-06
1552480_s_at	0.00536022	0.917179		0.0195776	0.700057		0.0131765	0.845847
1552481_s_at	0.230464	0.00606375		0.0487944	0.0824495		0.037297	0.0733592
1552482_at	0.0280785	0.803434		0.0387463	0.343224		0.022699	0.786424
1552484_at	0.192176	0.258968		0.212764	0.362972		0.00995909	0.880103
1552485_at	0.0380386	0.529945		0.0690894	0.0171372		0.412105	0.00267859
1552486_s_at	0.767131	0.00877339		0.193794	0.165158		0.0601257	0.130405
1552487_a_at	0.960443	0.000483045		0.0585932	0.0756784		0.701343	8.24415e-05
1552489_s_at	0.0344929	0.197961		0.0912681	0.31089		0.0101128	0.572126
1552490_at	0.236841	0.0343765		0.0304075	0.207772		0.021985	0.932505
1552491_at	0.100939	0.191618		0.0467796	0.398802		0.0176908	0.585397
1552493_s_at	0.11	0.711929		0.125825	0.0239403		0.0158005	0.261283
1552494_at	0.0308466	0.689735		0.0955953	0.123463		0.0192732	0.321644
1552496_a_at	0.0536016	0.592928		0.197635	0.13889		0.141589	0.109145
1552497_a_at	0.0113379	0.469811		0.447068	0.0465635		0.0216541	0.739802
1552498_at	0.014738	0.202883		0.0249459	0.0807948		0.0129911	0.311309
1552499_a_at	0.0993026	0.164118		0.0756777	0.290263		0.0191391	0.960991
1552501_a_at	0.0116824	0.567097		0.030984	0.0884346		0.0186589	0.575262
1552502_s_at	0.171531	0.00176716		0.1671	0.000914308		0.276389	0.0125417
1552503_at	0.957468	0.00557478		0.0754917	0.0234065		0.998927	1.36871e-05
1552504_a_at	0.0118843	0.326027		0.0362906	0.222416		0.0655598	0.132845
1552506_at	0.0304677	0.552828		0.647417	0.0243163		0.0219434	0.661485
1552507_at	0.0651356	0.127067		0.756429	0.0402647		0.0633438	0.125424
1552508_at	0.0150227	0.753504		0.888148	0.0200988		0.0126568	0.820361
1552509_a_at	0.0123683	0.820428		0.973082	0.00287467		0.0087798	0.581328
1552510_at	0.024644	0.24732		0.551317	0.0114899		0.0188353	0.35695
1552511_a_at	0.117914	0.508595		0.0844892	0.0401727		0.0143981	0.33388
1552514_at	0.0211192	0.689767		0.0725005	0.36069		0.00698222	0.415358
1552515_at	0.0293594	0.57072		0.057703	0.140927		0.0875738	0.13389
1552516_a_at	0.0259898	0.838032		0.0670062	0.702593		0.0260265	0.602718
1552518_s_at	0.0130641	0.464545		0.0232216	0.78163		0.00805084	0.579558
1552519_at	0.148894	0.348143		0.136386	0.100751		0.0709457	0.91098
1552520_at	0.0859276	0.268132		0.0387008	0.166302		0.0251442	0.357863
1552521_a_at	0.0554526	0.430087		0.0462899	0.547466		0.246831	0.00367236
1552522_at	0.0071868	0.0988663		0.030094	0.221451		0.0114312	0.142914
1552523_a_at	0.0080037	0.321255		0.0431195	0.752578		0.0530192	0.119352
1552524_at	0.0468176	0.508235		0.511863	0.00389923		0.0136605	0.417548
1552526_at	0.0514022	0.302457		0.064616	0.533242		0.066581	0.0682928
1552528_at	0.286526	0.0744918		0.0979597	0.0439184		0.049423	0.0365342
1552531_a_at	0.0271802	0.146629		0.0654911	0.0502001		0.0297773	0.269294
1552532_a_at	0.163006	0.0554165		0.0338423	0.292745		0.251047	0.0434681
1552535_at	0.0925455	0.112895		0.169307	0.055644		0.012103	0.313554
1552536_at	0.018262	0.852239		0.0681243	0.109392		0.365568	0.00405228
1552538_a_at	0.0184375	0.820301		0.063989	0.197838		0.0645375	0.250171
1552540_s_at	0.037766	0.316462		0.0729176	0.14163		0.0663018	0.154388
1552541_at	0.0565033	0.313892		0.361872	0.0185707		0.0127539	0.6703
1552542_s_at	0.198262	0.149992		0.0892814	0.105233		0.0145075	0.999759
1552543_a_at	0.184782	0.0110738		0.0815845	0.109611		0.980725	1.24994e-06
1552544_at	0.0248158	0.407108		0.635731	0.0306839		0.0130671	0.262213
1552546_a_at	0.013782	0.212497		0.967499	0.0373491		0.121375	0.0748742
1552548_at	0.0243496	0.28215		0.0420498	0.0186265		0.0161362	0.584066
1552549_a_at	0.0627545	0.0802641		0.537586	0.127546		0.0560241	0.101148
1552552_s_at	0.012993	0.342651		0.0606859	0.838814		0.0174728	0.845153
1552553_a_at	0.018874	0.358144		0.587491	0.0565606		0.0141441	0.771923
1552554_a_at	0.00997679	0.370101		0.891926	0.0974381		0.0194237	0.805623
1552555_at	0.0213587	0.378456		0.891551	0.000234019		0.0925444	0.460764
1552557_a_at	0.0379197	0.266221		0.598984	0.0713661		0.0135203	0.787637
1552558_a_at	0.114759	0.633391		0.819552	0.0180199		0.00981996	0.987487
1552559_a_at	0.0209451	0.265597		0.0413488	0.10087		0.0241076	0.730968
1552562_at	0.0677441	0.455609		0.36448	0.145811		0.0301539	0.326652
1552563_a_at	0.00999232	0.823714		0.0807242	0.509475		0.0111349	0.306364
1552564_at	0.0562954	0.0908672		0.0536172	0.058631		0.00884838	0.397117
1552566_at	0.0219604	0.861245		0.167318	0.0325309		0.0109643	0.55773
1552568_at	0.0187306	0.671039		0.492841	0.0227753		0.0358406	0.418376
1552569_a_at	0.0209709	0.423974		0.339693	0.0234954		0.0296193	0.361664
1552570_at	0.0155001	0.846177		0.18803	0.00842875		0.0276134	0.454082
1552572_a_at	0.0202329	0.911744		0.0836571	0.791473		0.0303547	0.987472
1552573_s_at	0.0226619	0.40588		0.0864686	0.936523		0.0556901	0.924936
1552575_a_at	0.137454	0.133991		0.527515	0.0698603		0.445649	0.744952
1552576_at	0.0488476	0.0507109		0.0737849	0.975581		0.0441123	0.119288
1552578_a_at	0.0895164	0.138843		0.0725089	0.0723528		0.0104259	0.700278
1552579_a_at	0.681677	0.0108325		0.26238	0.0374608		0.0266579	0.362579
1552580_at	0.0215689	0.902631		0.053732	0.0619699		0.0114219	0.309903
1552582_at	0.0308919	0.722807		0.249053	0.224169		0.0451762	0.46468
1552583_s_at	0.275938	0.0403534		0.411434	0.00903084		0.0239708	0.549423
1552584_at	0.0865172	0.415137		0.0391984	0.0300984		0.200967	0.071009
1552585_s_at	0.110432	0.186038		0.567579	0.0182902		0.00980056	0.976761
1552586_at	0.0402119	0.334246		0.286242	0.174871		0.0313748	0.466382
1552587_at	0.383991	0.00581058		0.13965	0.579988		0.171511	0.0531883
1552588_a_at	0.0419182	0.13605		0.044198	0.953639		0.0468132	0.483283
1552590_a_at	0.0376417	0.334923		0.355265	0.145041		0.0128144	0.222985
1552592_at	0.0224334	0.561501		0.0751634	0.347065		0.0343673	0.349858
1552594_at	0.0288511	0.0504846		0.0717031	0.142663		0.497721	0.00221072
1552596_at	0.0358697	0.654463		0.122812	0.133776		0.0224375	0.212466
1552598_at	0.0399196	0.292525		0.125702	0.235498		0.164217	0.0264081
1552599_at	0.016157	0.845454		0.882031	0.0153329		0.0123155	0.74242
1552602_at	0.0259468	0.557938		0.0832744	0.139571		0.0121437	0.558633
1552604_at	0.061694	0.651911		0.0379904	0.0190593		0.0991925	0.239043
1552605_s_at	0.0190828	0.463524		0.128064	0.00670096		0.00769077	0.714565
1552607_at	0.0334629	0.91921		0.34913	0.0179215		0.0154741	0.899782
1552608_at	0.0218602	0.423491		0.0603505	0.140158		0.0148037	0.519968
1552609_s_at	0.015155	0.919882		0.863407	0.0259759		0.0589349	0.23616
1552610_a_at	0.414055	0.00307203		0.0741191	0.166783		0.286565	0.0852893
1552611_a_at	0.900021	0.0538705		0.0475213	0.745011		0.0553134	0.152815
1552612_at	0.0515933	0.3664		0.0622519	0.00466165		0.0103299	0.881592
1552613_s_at	0.0484582	0.285745		0.112878	0.00731812		0.0491487	0.751514
1552615_at	0.0202412	0.984635		0.82475	0.00106599		0.0147873	0.758899
1552616_a_at	0.0583478	0.64367		0.306895	0.0217084		0.0731381	0.00713114
1552617_a_at	0.0565886	0.30963		0.377587	0.0106285		0.0570872	0.0181203
1552618_at	0.537918	0.0108415		0.39328	0.00653558		0.0497294	0.00128669
1552619_a_at	0.464813	0.0312602		0.140298	0.0104141		0.487304	0.0619501
1552620_at	0.0801613	0.0301483		0.139146	0.000176282		0.0573667	0.25484
1552621_at	0.147253	0.407543		0.147789	0.107894		0.450384	0.520401
1552622_s_at	0.198081	0.38027		0.104424	0.345366		0.728939	0.474694
1552623_at	0.0169722	0.821115		0.0697092	0.657738		0.0124861	0.676671
1552625_a_at	0.213684	0.0731514		0.180225	0.0166512		0.635686	8.86248e-05
1552626_a_at	0.013716	0.696895		0.0624801	0.0651842		0.0141269	0.937885
1552627_a_at	0.0555788	0.356178		0.0648239	0.00928565		0.590663	0.287008
1552628_a_at	0.762105	0.00561841		0.0611167	0.234454		0.821354	0.00015352
1552629_a_at	0.219044	0.0649725		0.141207	0.277556		0.012281	0.93344
1552630_a_at	0.014627	0.406383		0.1095	0.173514		0.0266428	0.524069
1552631_a_at	0.0394681	0.0643837		0.413863	0.00324785		0.0512752	0.191241
1552632_a_at	0.0214798	0.830542		0.125543	0.169625		0.0153674	0.939778
1552633_at	0.0726453	0.0594704		0.0537791	0.141797		0.0108236	0.475672
1552634_a_at	0.583681	0.0950005		0.031886	0.652064		0.00890818	0.713287
1552637_at	0.0203425	0.343293		0.112161	0.0192288		0.0145654	0.499669
1552639_at	0.106343	0.0280661		0.14543	0.112093		0.0494275	0.0694765
1552641_s_at	0.931956	0.0056049		0.302806	0.626221		0.317096	0.534271
1552643_at	0.77823	0.00634708		0.0675454	0.475182		0.867408	0.000885999
1552644_a_at	0.0578005	0.162184		0.252317	0.0712959		0.141427	0.0515523
1552646_at	0.0394565	0.559113		0.841724	0.0199493		0.0288607	0.172465
1552648_a_at	0.0248152	0.368287		0.872246	0.0208606		0.137318	0.0515348
1552649_a_at	0.00641764	0.380747		0.052687	0.0407223		0.0109371	0.440044
1552651_a_at	0.0255805	0.391053		0.428225	0.252893		0.0162462	0.459347
1552652_at	0.128313	0.0874794		0.0320539	0.300664		0.0301935	0.0612285
1552656_s_at	0.0278829	0.525466		0.0782729	0.0552364		0.0518012	0.0037221
1552657_a_at	0.063156	0.173329		0.0227185	0.414024		0.0651699	0.141398
1552658_a_at	0.677928	0.0523387		0.0747004	0.953558		0.00922445	0.590629
1552660_a_at	0.748389	0.0254542		0.231528	0.000269997		0.00748195	0.128822
1552661_at	0.00929808	0.990247		0.0320605	0.893923		0.0132564	0.247736
1552662_a_at	0.0216479	0.681803		0.182316	0.0365476		0.0237619	0.192467
1552663_a_at	0.306757	0.028688		0.389395	0.0328078		0.010618	0.227054
1552664_at	0.15057	0.0867924		0.103999	0.642461		0.286	0.0324124
1552665_at	0.969451	0.00852179		0.0304784	0.0416556		0.0169698	0.184686
1552666_a_at	0.0068849	0.853784		0.020216	0.783185		0.108085	0.0124583
1552667_a_at	0.0175265	0.85119		0.0501142	0.00116989		0.0201744	0.259265
1552669_at	0.0381209	0.236525		0.183439	0.0896084		0.00868389	0.712596
1552670_a_at	0.822902	0.0253133		0.0945617	0.396425		0.833429	0.0109868
1552671_a_at	0.327313	0.0350978		0.0486763	0.135651		0.0734114	0.152438
1552672_a_at	0.00803778	0.418813		0.0831369	0.00104268		0.553374	0.00229311
1552673_at	0.0607298	0.295583		0.0269304	0.166134		0.0142793	0.537386
1552674_at	0.122687	0.055619		0.0346722	0.891228		0.0146317	0.481685
1552675_at	0.017298	0.50584		0.066952	0.0149247		0.0187923	0.429052
1552676_at	0.126883	0.443351		0.379252	0.0147558		0.0854963	0.0253441
1552677_a_at	0.016771	0.812686		0.0797321	0.231161		0.0723235	0.238201
1552678_a_at	0.175971	0.877895		0.052666	0.128121		0.37926	0.000587409
1552680_a_at	0.0443355	0.203968		0.0325042	0.692645		0.0459914	0.256362
1552682_a_at	0.171689	0.057571		0.191741	0.78343		0.047398	0.34925
1552684_a_at	0.014584	0.100868		0.0339534	0.646955		0.0728373	0.0747042
1552685_a_at	0.0230381	0.207829		0.369786	0.00152524		0.837429	0.00265647
1552686_at	0.0507906	0.504096		0.142132	0.037076		0.038565	0.117038
1552687_a_at	0.0353113	0.296401		0.65375	0.0174358		0.0392585	0.27541
1552689_at	0.0137909	0.965106		0.966804	0.00143173		0.0126242	0.790372
1552690_a_at	0.266484	0.223623		0.738782	0.00160963		0.0430233	0.0206393
1552691_at	0.00647609	0.931899		0.0149825	0.335027		0.00908643	0.540567
1552693_at	0.0457881	0.837317		0.109427	0.175596		0.0133369	0.413833
1552694_at	0.0123154	0.39482		0.0271394	0.547363		0.0279586	0.420233
1552695_a_at	0.0145483	0.758331		0.0289524	0.454545		0.0169387	0.27461
1552696_at	0.0196118	0.513836		0.056112	0.218251		0.016278	0.805076
1552698_at	0.0355769	0.236323		0.374237	0.363861		0.0117498	0.942986
1552701_a_at	0.326819	0.013596		0.0784826	0.0217893		0.18761	0.0587877
1552703_s_at	0.927268	0.0639905		0.113161	0.535183		0.746901	0.000169304
1552705_at	0.0102219	0.109062		0.0220636	0.595367		0.306705	0.0211399
1552708_a_at	0.012003	0.663208		0.418612	0.168656		0.0517533	0.0990559
1552711_a_at	0.992707	0.000664852		0.7562	0.0204436		0.788933	6.26814e-05
1552712_a_at	0.344065	0.105066		0.0536922	0.841691		0.0292821	0.563265
1552713_a_at	0.0388618	0.384173		0.554303	0.0140962		0.0352341	0.320883
1552714_at	0.0217769	0.708239		0.578812	0.0234606		0.0135679	0.51647
1552715_a_at	0.015689	0.345597		0.0338259	0.256859		0.0189705	0.742429
1552716_at	0.0124161	0.741633		0.0403159	0.720808		0.0149127	0.557561
1552717_s_at	0.0132952	0.153429		0.143753	0.0225514		0.233588	0.0118304
1552718_at	0.0677134	0.0867059		0.189083	0.00465731		0.527301	0.00200552
1552719_at	0.03185	0.422198		0.0554423	0.454197		0.053554	0.221151
1552721_a_at	0.069001	0.444582		0.363727	0.0705991		1	6.89978e-09
1552722_at	0.0165163	0.485092		0.0230919	0.929493		0.0298577	0.235822
1552724_at	0.166943	0.19952		0.15788	0.0557018		0.129996	0.0323767
1552725_s_at	0.0137179	0.565352		0.0459042	0.0364302		0.531793	0.00303538
1552726_at	0.0317443	0.535355		0.864585	0.0153485		0.0147019	0.45279
1552727_s_at	0.065195	0.164783		0.261474	0.0323468		0.0102664	0.836771
1552729_at	0.0298178	0.708022		0.218214	0.0743613		0.0128577	0.445739
1552730_at	0.0343515	0.943653		0.352283	0.0408233		0.159762	0.0136526
1552731_at	0.120243	0.0510518		0.258128	0.352254		0.0177066	0.484683
1552732_at	0.20315	0.0557675		0.0333239	0.154293		0.0544384	0.631733
1552733_at	0.00940286	0.152006		0.0232175	0.0975079		0.709892	0.000240025
1552734_at	0.0487834	0.156762		0.0618463	0.128096		0.0165761	0.461829
1552735_at	0.0117492	0.407137		0.0216354	0.740244		0.0722335	0.569694
1552736_a_at	0.0161554	0.363039		0.0719549	0.885505		0.0145122	0.815567
1552737_s_at	0.962472	0.0163702		0.0871205	0.918709		0.251778	0.216454
1552738_a_at	0.130327	0.065949		0.0268954	0.0236778		0.0275283	0.102538
1552739_s_at	0.95879	0.00947933		0.111753	0.0482094		0.0743103	0.00106692
1552740_at	0.0194763	0.787267		0.02982	0.293478		0.143969	0.0742918
1552742_at	0.0621856	0.118047		0.0351068	0.668512		0.0131081	0.973206
1552743_at	0.0225289	0.199001		0.624828	0.227		0.0908879	0.214954
1552745_at	0.0481885	0.143074		0.251464	0.325429		0.0406165	0.00365444
1552747_a_at	0.0292573	0.304398		0.210388	0.0829847		0.00686604	0.791722
1552749_a_at	0.0313124	0.521132		0.032122	0.00564363		0.0108527	0.923971
1552750_at	0.0782782	0.302974		0.14792	0.432058		0.011452	0.423345
1552751_a_at	0.0258586	0.575178		0.112428	0.12175		0.00856536	0.411707
1552752_a_at	0.344892	0.0510463		0.413898	0.0311425		0.0306803	0.112008
1552754_a_at	0.0246271	0.174317		0.234385	0.12438		0.00795047	0.401332
1552755_at	0.0599151	0.112769		0.0741671	0.169838		0.53151	0.0511468
1552757_s_at	0.0201765	0.238373		0.592595	0.174071		0.036874	0.45452
1552758_at	0.0395716	0.157724		0.0645438	0.709342		0.0148329	0.341628
1552760_at	0.0670425	0.142359		0.11256	0.0064703		0.0172264	0.701858
1552761_at	0.0802125	0.505438		0.166768	0.117266		0.0825104	0.154094
1552763_at	0.00998686	0.73409		0.023702	0.888067		0.0213664	0.496178
1552765_x_at	0.0142697	0.753158		0.0268829	0.558035		0.0222256	0.312259
1552766_at	0.00723463	0.776865		0.0163305	0.638125		0.0201507	0.990768
1552767_a_at	0.0207668	0.124245		0.758967	0.758723		0.0127737	0.134939
1552768_at	0.0163711	0.301192		0.0539302	0.985751		0.0109719	0.410704
1552769_at	0.00891006	0.915906		0.0195915	0.919573		0.0929254	0.158329
1552770_s_at	0.0132902	0.846871		0.122502	0.0139661		0.0128052	0.754869
1552771_a_at	0.0957392	0.192223		0.0416513	0.0515235		0.0335939	0.122495
1552772_at	0.0163532	0.926912		0.930125	0.0237157		0.0302209	0.167494
1552773_at	0.430699	0.132461		0.0592858	0.0372166		0.0339199	0.0149523
1552774_a_at	0.0903245	0.134734		0.182316	0.890466		0.292439	0.274351
1552775_at	0.017458	0.16647		0.972215	0.0511746		0.0150271	0.260969
1552777_a_at	0.0660931	0.0513279		0.0458095	0.185957		0.276739	0.0527608
1552779_a_at	0.0261744	0.0700542		0.177872	0.328225		0.00873385	0.709522
1552782_at	0.00621828	0.793203		0.117587	0.372579		0.0491548	0.131406
1552783_at	0.0281965	0.689483		0.049243	0.0774109		0.0321096	0.0687016
1552785_at	0.00966786	0.798496		0.400203	0.116856		0.0129115	0.223309
1552787_at	0.0251508	0.126183		0.196574	0.655504		0.0117492	0.931954
1552788_a_at	0.627502	0.00526155		0.0194503	0.340851		0.0938855	0.0890564
1552789_at	0.0697919	0.378347		0.0928205	0.0355662		0.016872	0.991096
1552790_a_at	0.0716166	0.892524		0.133982	0.00649474		0.0412906	0.381869
1552791_a_at	0.0152841	0.918963		0.0530362	0.163069		0.018141	0.271853
1552792_at	0.024238	0.151259		0.0466968	0.0417839		0.551494	0.00109406
1552793_at	0.0473316	0.12542		0.0941093	0.0178205		0.0144339	0.628596
1552794_a_at	0.0873962	0.0294383		0.116442	0.0142264		0.0791845	0.385569
1552796_a_at	0.0466853	0.109473		0.12359	0.233642		0.0109798	0.657512
1552797_s_at	0.953613	0.0104525		0.966682	0.00496855		0.0335094	0.00228772
1552798_a_at	0.79802	0.0563727		0.0454539	0.29423		0.123702	0.0485724
1552799_at	0.0353332	0.867121		0.27175	0.0587339		0.0355143	0.130253
1552800_at	0.0224545	0.339849		0.378288	0.0133305		0.101951	0.113964
1552801_at	0.0104778	0.916951		0.132289	0.202561		0.0100977	0.594783
1552803_a_at	0.028821	0.299337		0.0711138	0.119564		0.0161975	0.728184
1552804_a_at	0.0730543	0.904742		0.124329	0.0435176		0.0202542	0.0267433
1552806_a_at	0.0261968	0.678798		0.0424066	0.0802653		0.0175823	0.468774
1552807_a_at	0.0269782	0.988863		0.172268	0.036222		0.0202433	0.627731
1552808_at	0.0897997	0.0640024		0.0158223	0.935437		0.0116324	0.453536
1552809_at	0.0182317	0.542589		0.111618	0.169642		0.0475629	0.114828
1552811_at	0.0336875	0.938783		0.277269	0.0109277		0.0208298	0.289502
1552812_a_at	0.0442115	0.00583013		0.0626433	0.00584781		0.0333833	0.645097
1552813_at	0.0425955	0.304294		0.0436592	0.270896		0.0248297	0.451312
1552814_a_at	0.0119177	0.868167		0.0906282	0.0740321		0.0144071	0.118085
1552816_at	0.0298052	0.504564		0.0633164	0.412556		0.00914375	0.733211
1552818_a_at	0.00730527	0.376273		0.021184	0.0235017		0.0191545	0.202656
1552819_at	0.0223774	0.578472		0.990768	0.0036832		0.0133062	0.732749
1552822_at	0.0329805	0.637717		0.09982	0.0339158		0.0137821	0.87152
1552825_at	0.0168504	0.0743311		0.0854575	0.00936135		0.0137704	0.165702
1552826_at	0.0385881	0.330729		0.0234342	0.491295		0.00666014	0.743937
1552827_s_at	0.0555155	0.285453		0.659574	0.000866268		0.0133087	0.838137
1552828_at	0.0614281	0.34026		0.0306589	0.20953		0.0102898	0.134597
1552829_at	0.0113313	0.928848		0.28515	0.0197046		0.140518	0.110823
1552830_at	0.0253	0.672173		0.152932	0.149298		0.00964726	0.821257
1552833_at	0.271436	0.561169		0.110504	0.0128164		0.047234	0.0106182
1552834_at	0.00746266	0.0411925		0.0179199	0.0421783		0.011671	0.610169
1552835_at	0.044532	0.111958		0.0482468	0.147515		0.0112893	0.726941
1552836_at	0.0926817	0.137493		0.115137	0.00774945		0.0151146	0.47727
1552837_at	0.0124728	0.483291		0.0211026	0.421594		0.0300762	0.0391783
1552839_at	0.0249069	0.534023		0.111378	0.017141		0.0517835	0.165918
1552841_s_at	0.225074	0.105187		0.238857	0.00815429		0.113668	0.105416
1552842_at	0.0864668	0.637054		0.119819	0.139045		0.281419	0.0219468
1552843_at	0.0692528	0.25499		0.0486637	0.697292		0.016012	0.0816432
1552845_at	0.0591213	0.434512		0.352363	0.0768666		0.0364497	0.131762
1552846_s_at	0.014035	0.57988		0.116511	0.207975		0.423498	0.0110038
1552848_a_at	0.052505	0.497621		0.043533	0.075498		0.0202604	0.927402
1552849_at	0.0141332	0.13776		0.0505295	0.0242036		0.0188757	0.588603
1552851_at	0.0142069	0.50171		0.0324472	0.37493		0.0164792	0.891094
1552852_a_at	0.0211063	0.393485		0.383908	0.0737007		0.0967951	0.0379478
1552853_at	0.0120986	0.193155		0.0542148	0.40963		0.0126692	0.663545
1552854_a_at	0.233664	0.211969		0.162912	0.069645		0.0189664	0.251621
1552856_at	0.0194524	0.672382		0.180667	0.385832		0.00951551	0.391134
1552857_a_at	0.435857	0.591546		0.191215	0.0365435		0.0185413	0.0975814
1552858_at	0.00729889	0.887099		0.065279	0.345712		0.0119268	0.414628
1552860_at	0.0161751	0.221355		0.0476454	0.0460829		0.0219373	0.333719
1552862_at	0.0214692	0.47612		0.0624523	0.551962		0.0298886	0.396835
1552863_a_at	0.620663	0.0267045		0.703212	0.0467522		0.0497672	0.238257
1552865_a_at	0.0176522	0.917524		0.900461	0.00137447		0.0244411	0.2529
1552867_at	0.023156	0.829776		0.0595105	0.416921		0.0716271	0.457067
1552868_at	0.0140273	0.0530356		0.191615	0.0555399		0.0212913	0.369526
1552870_s_at	0.0197998	0.741941		0.0488004	0.823224		0.0117351	0.518962
1552872_at	0.0678653	0.273744		0.0760037	0.229576		0.0211886	0.388727
1552873_s_at	0.141115	0.26894		0.503393	0.0130357		0.0179815	0.533525
1552875_a_at	0.0178762	0.375648		0.191573	0.082326		0.0166871	0.456184
1552876_at	0.0128158	0.668037		0.955156	0.00444052		0.0317146	0.146713
1552877_s_at	0.0103797	0.893641		0.741557	0.0800935		0.00926681	0.616285
1552878_at	0.0246659	0.950708		0.567486	0.0283571		0.00830891	0.712885
1552879_a_at	0.0106894	0.26033		0.219034	0.0651511		0.0107513	0.522541
1552880_at	0.0235851	0.250746		0.163652	0.0289185		0.014072	0.267053
1552882_a_at	0.0845524	0.597304		0.0914552	0.111554		0.0134303	0.388045
1552884_at	0.0394471	0.132657		0.394401	0.0585555		0.016337	0.475561
1552885_a_at	0.0240289	0.656849		0.0572914	0.262184		0.0628135	0.154362
1552887_at	0.0140638	0.431794		0.224776	0.131681		0.0192072	0.892673
1552889_a_at	0.0227193	0.564977		0.477445	0.00303814		0.00951026	0.495769
1552890_a_at	0.0236706	0.819346		0.289619	0.100615		0.0338693	0.014079
1552892_at	0.073606	0.306542		0.826677	0.00119569		0.0631521	0.171302
1552893_at	0.312189	0.739086		0.179829	0.0378494		0.288926	0.025676
1552895_a_at	0.0286699	0.552826		0.04375	0.0942942		0.0147559	0.749175
1552897_a_at	0.108751	0.155423		0.0973865	0.533851		0.0246993	0.738747
1552898_a_at	0.0941737	0.580012		0.446785	0.0109973		0.0167065	0.285858
1552899_at	0.0389506	0.334303		0.0529813	0.251488		0.0320461	0.0377826
1552900_a_at	0.044833	0.16234		0.173354	0.00182701		0.03004	0.692573
1552902_a_at	0.01682	0.952569		0.232128	0.162798		0.0135197	0.604892
1552903_at	0.0215557	0.440897		0.622286	0.0414961		0.269958	0.0073478
1552904_at	0.0121793	0.93391		0.0295858	0.76735		0.0389089	0.0932553
1552906_at	0.0147465	0.549727		0.0631052	0.219543		0.0116104	0.741376
1552908_at	0.0132055	0.45479		0.014599	0.620745		0.032783	0.119118
1552910_at	0.0186663	0.516398		0.623172	0.107932		0.0194793	0.940044
1552911_at	0.0108329	0.980107		0.0340447	0.984418		0.0310124	0.270167
1552912_a_at	0.0106458	0.408486		0.0864824	0.0162082		0.012337	0.159207
1552913_at	0.0312234	0.958716		0.486219	0.0535903		0.0073334	0.537235
1552914_a_at	0.142715	0.0984008		0.0540474	0.19978		0.118924	0.165379
1552915_at	0.196913	0.523301		0.167397	0.0993056		0.0164327	0.805044
1552917_at	0.0490258	0.387042		0.256176	0.00336698		0.0118959	0.771819
1552919_at	0.215784	0.00358784		0.233597	0.021524		0.0224645	0.658734
1552921_a_at	0.806779	0.00768487		0.118766	0.0365463		0.015993	0.889602
1552922_at	0.0396418	0.0628603		0.142284	0.00941866		0.011976	0.840056
1552923_a_at	0.0138642	0.300008		0.0859594	0.0195775		0.425646	0.0106769
1552924_a_at	0.0386822	0.830053		0.480441	0.0253961		0.955678	0.000508036
1552925_at	0.0185874	0.305637		0.0241163	0.461118		0.0241857	0.604384
1552927_at	0.834782	0.0720311		0.225476	0.000981672		0.0619726	0.370571
1552928_s_at	0.188449	0.42619		0.157147	0.0237752		0.0245725	0.941079
1552929_at	0.0586763	0.30186		0.161075	0.0424058		0.0214307	0.554813
1552930_at	0.0278254	0.732876		0.692125	0.028866		0.250998	0.0442159
1552931_a_at	0.0191423	0.0876034		0.057246	0.0106452		0.0211019	0.0641726
1552932_at	0.0215565	0.686389		0.464768	0.0555762		0.0135019	0.593487
1552933_at	0.0151295	0.712642		0.100906	0.353427		0.00926745	0.370144
1552935_at	0.0120161	0.297711		0.95715	0.0141858		0.0203171	0.609107
1552937_s_at	0.0832757	0.220803		0.259166	0.304741		0.0120986	0.203561
1552938_at	0.0126076	0.38419		0.189685	0.108066		0.0140387	0.155058
1552939_at	0.0662416	0.0192528		0.0297551	0.260923		0.00874974	0.0825337
1552940_at	0.0379656	0.324497		0.0600346	0.516646		0.0178828	0.256122
1552942_at	0.0805968	0.201819		0.434764	0.0343282		0.0475371	0.0837119
1552943_at	0.233865	0.0021913		0.25747	0.295588		0.0141696	0.730968
1552944_a_at	0.0183175	0.935121		0.117406	0.111007		0.0194575	0.256383
1552946_at	0.00792474	0.15573		0.0218774	0.474491		0.0291994	0.292918
1552947_x_at	0.0684067	0.244565		0.0378884	0.338042		0.159891	0.0472164
1552948_at	0.0226416	0.714164		0.0764899	0.86129		0.0166511	0.210058
1552950_at	0.0169609	0.180643		0.0569615	0.537731		0.0118747	0.900868
1552952_at	0.216352	0.117006		0.0868281	0.18202		0.0408833	0.233873
1552953_a_at	0.0427501	0.21852		0.181868	0.0808904		0.0254141	0.427962
1552954_at	0.0205776	0.920992		0.087131	0.0832609		0.121855	0.208418
1552955_at	0.0222621	0.911245		0.659937	0.0444556		0.535589	0.162032
1552957_at	0.0117811	0.71447		0.027199	0.694821		0.018718	0.223611
1552960_at	0.0522162	0.27907		0.138907	0.0259788		0.0142764	0.702952
1552961_at	0.0089671	0.771142		0.043884	0.53981		0.0444591	0.21231
1552964_at	0.0601004	0.195473		0.465775	0.032962		0.0861409	0.0829213
1552965_a_at	0.0199605	0.462307		0.300033	0.063719		0.00925389	0.949255
1552967_at	0.0304279	0.693931		0.246316	0.000271807		0.270971	0.102181
1552969_a_at	0.0565233	0.224783		0.0936088	0.04377		0.0151419	0.617585
1552970_s_at	0.0406734	0.130362		0.320012	0.0468138		0.0283718	0.0332556
1552971_at	0.00980124	0.329021		0.958472	0.00401936		0.00962747	0.208622
1552972_at	0.0419902	0.0484404		0.0812163	0.0027718		0.0247276	0.351704
1552973_at	0.0114245	0.447022		0.820597	0.00347837		0.0427555	0.143431
1552974_at	0.0126754	0.351662		0.108345	0.157996		0.0180941	0.34563
1552975_x_at	0.0766931	0.139996		0.420102	0.863977		0.0144179	0.969261
1552976_at	0.0270959	0.81101		0.109757	0.0262139		0.0168688	0.160377
1552977_a_at	0.708651	0.0172188		0.0679987	0.00850927		0.525009	0.00205025
1552978_a_at	0.740317	0.205949		0.0807731	0.049337		0.578125	0.317885
1552979_at	0.0254999	0.849544		0.390743	0.0662807		0.0330887	0.213991
1552980_at	0.184017	0.988655		0.0445885	0.0747651		0.00944666	0.660267
1552982_a_at	0.0252409	0.68339		0.38267	0.0737722		0.0450118	0.403118
1552985_at	0.0234507	0.846262		0.650044	0.0126621		0.0171399	0.941021
1552986_at	0.0224595	0.119683		0.0743212	0.19254		0.0394437	0.232659
1552987_a_at	0.658527	0.00455814		0.0171118	0.221157		0.0319313	0.159022
1552988_at	0.00776298	0.593728		0.0224668	0.371165		0.0332181	0.0652079
1552990_at	0.0386888	0.26714		0.347906	0.0279653		0.0208357	0.200427
1552991_at	0.136028	0.168722		0.163075	0.0117368		0.0386314	0.877013
1552993_at	0.083205	0.106496		0.0438735	0.695384		0.0151173	0.115474
1552995_at	0.0191971	0.603533		0.234794	0.0184049		0.00756171	0.475028
1552997_a_at	0.0286258	0.792976		0.171885	0.0211657		0.00938759	0.213056
1552998_at	0.0539859	0.468284		0.107076	0.115708		0.0251225	0.296917
1552999_a_at	0.0273352	0.815133		0.127447	0.466026		0.047248	0.425519
1553002_at	0.0150805	0.27308		0.0218075	0.224013		0.0216031	0.549454
1553003_at	0.0239845	0.465564		0.0408001	0.0421977		0.0173402	0.560725
1553004_at	0.0239891	0.218769		0.519832	0.17018		0.0384664	0.121411
1553006_at	0.0316817	0.674326		0.697617	0.0114243		0.068794	0.21362
1553007_a_at	0.203287	0.593222		0.156954	0.0682804		0.0212769	0.298691
1553009_s_at	0.404214	0.365724		0.0742903	0.194122		0.0140416	0.900899
1553011_at	0.00999137	0.259551		0.0188139	0.652829		0.0104179	0.49623
1553013_at	0.0185801	0.759443		0.197154	0.173093		0.0457204	0.0687242
1553015_a_at	0.645406	0.231296		0.0878774	0.0410839		0.0581343	0.164953
1553016_at	0.250481	0.0852576		0.52299	0.0433419		0.0246395	0.393683
1553019_at	0.0161186	0.755171		0.0376374	0.014874		0.0138298	0.112863
1553020_at	0.0138173	0.947434		0.0499827	0.215448		0.0165757	0.757063
1553021_s_at	0.0149271	0.994746		0.072265	0.0304411		0.188219	0.133695
1553022_at	0.0158024	0.915676		0.0464708	0.455938		0.0436727	0.336865
1553023_a_at	0.118258	0.0519031		0.0315356	0.0118893		0.0517152	0.0761887
1553024_at	0.0204276	0.304884		0.684886	0.0156684		0.015304	0.888778
1553025_at	0.0239055	0.357506		0.062024	0.0391994		0.0165377	0.464423
1553027_a_at	0.993008	0.00354213		0.0160592	0.164352		0.0645752	0.275264
1553028_at	0.016452	0.881999		0.484443	0.0440921		0.0349131	0.327119
1553030_a_at	0.0373722	0.357165		0.306041	0.460972		0.103697	0.854219
1553031_at	0.925323	0.000715002		0.0586464	0.29895		0.0191935	0.888496
1553032_at	0.0133575	0.0554197		0.0511836	0.17064		0.0133102	0.425884
1553033_at	0.0155784	0.525997		0.0421421	0.00918199		0.017136	0.577379
1553034_at	0.0402669	0.345206		0.188374	0.0147382		0.0093633	0.730273
1553036_at	0.0563593	0.220084		0.107789	0.627589		0.255787	0.0320228
1553037_a_at	0.0312858	0.808622		0.129362	0.0323068		0.0226418	0.0867378
1553039_a_at	0.027161	0.798011		0.266725	0.0164539		0.0162837	0.526923
1553041_at	0.0192425	0.798599		0.0935902	0.0882657		0.0243051	0.522009
1553042_a_at	0.0408308	0.400561		0.069602	0.00832106		0.43989	0.0136804
1553043_a_at	0.10316	0.0246656		0.331551	0.0953486		0.037556	0.0867426
1553044_at	0.0356205	0.942566		0.379363	0.000622032		0.0124988	0.811277
1553045_at	0.0154057	0.733226		0.044969	0.00110173		0.256932	0.0132512
1553046_s_at	0.0454221	0.28319		0.957914	0.00788518		0.0164563	0.0335468
1553047_at	0.0149203	0.247484		0.0421305	0.0766189		0.0154887	0.519376
1553048_a_at	0.0955996	0.865036		0.173891	0.0400207		0.179054	0.483969
1553051_s_at	0.0518981	0.948587		0.066011	0.0182699		0.0102312	0.0718928
1553052_at	0.0100828	0.71482		0.610933	0.0597951		0.0102222	0.733284
1553053_at	0.245343	0.521235		0.302163	0.0579759		0.0278417	0.680828
1553055_a_at	1	0.000343597		0.974517	0.0070908		0.933019	7.01216e-05
1553057_at	0.0380001	0.306999		0.853478	0.0100562		0.0979354	0.0228507
1553058_at	0.0222586	0.661803		0.174213	0.0782026		0.0135349	0.541611
1553059_at	0.123612	0.0119465		0.701423	0.00228391		0.0149011	0.412362
1553060_at	0.066566	0.607778		0.166843	0.157125		0.0147488	0.593457
1553061_at	0.0104174	0.47436		0.0497528	0.00740028		0.0141482	0.949511
1553062_at	0.0230877	0.49886		0.17489	0.0623103		0.193208	0.0295596
1553063_at	0.0432891	0.994772		0.121095	0.0110743		0.0235984	0.768092
1553064_at	0.0209564	0.583643		0.0840299	0.203943		0.0135501	0.767299
1553066_at	0.0436148	0.120464		0.205344	0.0355577		0.0221807	0.34982
1553067_a_at	0.0162599	0.427578		0.436797	0.00743877		0.0145368	0.633592
1553069_at	0.0254594	0.527312		0.406081	0.154217		0.0193578	0.374011
1553070_a_at	0.0493668	0.636511		0.411587	0.00491198		0.0182666	0.699741
1553071_a_at	0.0195508	0.247247		0.616698	0.0206741		0.0167681	0.384255
1553072_at	0.26837	0.016961		0.121251	0.00244459		0.0113112	0.592136
1553074_at	0.0544698	0.528118		0.185737	0.231407		0.0262911	0.705221
1553075_a_at	0.0114287	0.634084		0.0328959	0.868187		0.0221288	0.11453
1553076_at	0.0423341	0.228413		0.0932239	0.227872		0.0105149	0.238006
1553077_at	0.0282707	0.559275		0.486151	0.130333		0.0138689	0.769153
1553078_at	0.074828	0.484987		0.268444	0.000610542		0.103459	0.0960532
1553079_at	0.0121669	0.721145		0.0526298	0.238592		0.0506919	0.0999948
1553080_at	0.0345592	0.596489		0.76568	0.00393382		0.0246123	0.222088
1553081_at	0.0178293	0.576494		0.0521686	0.0407546		0.0195888	0.674905
1553082_at	0.0193904	0.844129		0.0762925	0.183119		0.0366479	0.186322
1553083_at	0.159913	0.0369805		0.570659	0.00223522		0.0198231	0.344996
1553084_at	0.010245	0.171081		0.81251	0.001008		0.00586433	0.0226157
1553086_at	0.197467	0.0818277		0.310621	0.206483		0.0191713	0.625524
1553087_at	0.0758918	0.587839		0.555424	0.0283179		0.0176471	0.7088
1553088_a_at	0.0264479	0.884422		0.580794	0.0527088		0.0254785	0.283015
1553089_a_at	0.0299377	0.640204		0.115625	0.0028301		0.0313601	0.261702
1553093_a_at	0.0249554	0.325533		0.349896	0.0779566		0.0254062	0.445256
1553094_at	0.0285497	0.614101		0.0652419	0.888829		0.0323882	0.802119
1553096_s_at	0.0455036	0.183509		0.49043	0.00038507		0.122612	0.0461549
1553099_at	0.0212051	0.83953		0.267515	0.336834		0.0329124	0.312809
1553101_a_at	0.0267688	0.554673		0.915442	0.000230496		0.0160869	0.23557
1553102_a_at	0.0226635	0.292047		0.0755408	0.07518		0.452997	0.000488188
1553103_at	0.747052	0.00693349		0.607882	0.0138058		0.581528	0.00156007
1553105_s_at	0.0622878	0.430723		0.0578444	0.010407		0.608834	0.0213235
1553106_at	0.90353	0.0111802		0.478728	0.0112986		0.827403	0.000141476
1553107_s_at	0.0503571	0.174657		0.256864	0.0563675		0.0210566	0.0442676
1553108_at	0.0755474	0.191192		0.195461	0.0400151		0.104756	0.0138797
1553111_a_at	0.0896013	0.0359679		0.0810182	0.101108		0.0611643	0.063847
1553112_s_at	0.183994	0.438353		0.0750539	0.022201		0.0429072	0.302324
1553113_s_at	0.0532267	0.766686		0.081712	0.0088087		0.0109499	0.806091
1553114_a_at	0.00556159	0.190676		0.0305025	0.00636071		0.0104733	0.793402
1553115_at	0.052643	0.158216		0.248894	0.00892367		0.0129529	0.928736
1553117_a_at	0.0283004	0.580194		0.104489	0.0855151		0.0226506	0.82555
1553118_at	0.216853	0.00188441		0.205029	0.134755		0.128088	0.0621614
1553120_at	0.88228	0.0127362		0.0518753	0.0892262		0.0212873	0.430246
1553122_s_at	0.043857	0.840741		0.118601	0.0363562		0.0185116	0.1294
1553123_at	0.0163383	0.422275		0.0253023	0.400134		0.0212177	0.541371
1553125_x_at	0.0148999	0.236559		0.0354286	0.398847		0.0140939	0.78561
1553126_a_at	0.0147619	0.659582		0.0330653	0.96293		0.0113504	0.335672
1553127_a_at	0.0180307	0.456438		0.105493	0.917629		0.0271899	0.91641
1553129_at	0.0107478	0.935279		0.0595477	0.609414		0.0112485	0.364034
1553130_at	0.00565613	0.584811		0.0119903	0.720142		0.0199161	0.138064
1553131_a_at	0.0327599	0.417803		0.148056	0.198002		0.0104655	0.986671
1553132_a_at	0.0160895	0.420912		0.050558	0.0639678		0.860111	0.0136512
1553133_at	0.575051	0.0389652		0.0964272	0.828759		0.319674	0.00218218
1553134_s_at	0.0713736	0.0410954		0.0379062	0.00536756		0.0511221	0.520624
1553136_at	0.45066	0.0314985		0.578145	0.0160124		0.14513	0.046121
1553137_s_at	0.0248624	0.441002		0.135602	0.0718636		0.911749	0.000509503
1553138_a_at	0.067726	0.524621		0.0383512	0.857603		0.072309	0.304433
1553139_s_at	0.0181898	0.211003		0.318179	0.0399571		0.0298366	0.065116
1553140_at	0.0425969	0.0892049		0.0331267	0.393835		0.04544	0.169449
1553141_at	0.0225655	0.905697		0.192189	0.00403398		0.0436348	0.0190805
1553142_at	0.0923357	0.569929		0.476111	0.0538374		0.353719	0.000482761
1553145_at	0.0484492	0.650405		0.0713762	0.2849		0.468079	0.241353
1553146_at	0.0266486	0.967208		0.757507	0.0100786		0.0136452	0.883769
1553147_at	0.0343047	0.454698		0.163754	0.14599		0.0471016	0.0761452
1553148_a_at	0.0623556	0.995614		0.100373	0.168576		0.336627	0.448157
1553150_at	0.0261317	0.377878		0.0682289	0.188661		0.405251	0.000577406
1553151_at	0.190681	0.0196921		0.110748	0.0989159		0.0242302	0.758933
1553153_at	0.0203009	0.801499		0.707418	0.00596392		0.0638611	0.266027
1553155_x_at	0.0288472	0.0729306		0.140787	0.022144		0.0662228	0.339296
1553156_at	0.0189766	0.689728		0.88106	0.00354308		0.0168252	0.58563
1553157_at	0.0197982	0.621635		0.627863	0.012728		0.0196315	0.68015
1553158_at	0.0765861	0.316982		0.0321423	0.534988		0.0290482	0.754278
1553159_at	0.013972	0.902562		0.92077	0.00413858		0.0116621	0.560145
1553162_x_at	0.113638	0.0761656		0.183647	0.00626914		0.017655	0.415781
1553163_at	0.023689	0.880846		0.492712	0.00446713		0.0212576	0.667317
1553165_at	0.024568	0.121901		0.0744979	0.0073144		0.0202924	0.69269
1553166_at	0.0412804	0.745223		0.90794	0.006886		0.0128968	0.265806
1553167_a_at	0.0820621	0.665066		0.0680028	0.0325319		0.0275021	0.627965
1553168_at	0.0739322	0.246085		0.545382	0.00785362		0.0187234	0.248955
1553169_at	0.584378	0.173868		0.0941447	0.156512		0.0236954	0.12724
1553171_x_at	0.0287727	0.685369		0.669362	0.0233432		0.0139708	0.498479
1553172_at	0.176403	0.253287		0.0844087	0.357282		0.551378	0.0752538
1553174_at	0.209579	0.0281353		0.0817381	0.00232679		0.25469	0.0382967
1553175_s_at	0.0189333	0.576429		0.153047	0.0527689		0.0232853	0.311991
1553176_at	0.032853	0.434802		0.366266	0.0177347		0.144552	0.0376336
1553177_at	0.0295517	0.487141		0.991986	0.000600131		0.0156523	0.913159
1553178_a_at	0.0220304	0.642229		0.476051	0.00113849		0.048034	0.178745
1553179_at	0.558524	0.182114		0.233067	0.0326625		0.0164916	0.557569
1553180_at	0.0144178	0.330458		0.0767507	0.983209		0.035971	0.360983
1553181_at	0.889692	0.0126758		0.735381	0.0396558		0.0164697	0.719777
1553183_at	0.0133782	0.768965		0.0383371	0.615714		0.022538	0.639936
1553185_at	0.0644288	0.982154		0.150574	0.0206289		0.172272	0.586781
1553186_x_at	0.0530389	0.995587		0.129471	0.0242493		0.100989	0.686651
1553188_s_at	0.0338722	0.397791		0.137765	0.275423		0.0205344	0.0316231
1553190_s_at	0.0352284	0.847032		0.790178	0.0145888		0.0558319	0.0979778
1553191_at	0.0257469	0.76498		0.0501146	0.611253		0.0332746	0.565745
1553192_at	0.0199952	0.641736		0.138832	0.434028		0.928073	0.00306865
1553193_at	0.0185074	0.9996		0.456801	0.0891234		0.0148638	0.209726
1553194_at	0.0218704	0.489926		0.153359	0.0850052		0.0365603	0.1188
1553196_a_at	0.116291	0.261913		0.389481	0.141671		0.0122614	0.95268
1553197_at	0.883117	0.00839514		0.0456149	0.90936		0.0388359	0.128892
1553199_at	0.0871204	0.579366		0.0718991	0.0261013		0.0193261	0.300615
1553202_at	0.0237171	0.51057		0.0895059	0.132019		0.0162234	0.894237
1553204_at	0.00704181	0.646952		0.978497	0.00152264		0.0161461	0.564128
1553205_at	0.034224	0.652371		0.253901	0.0576263		0.0154222	0.982438
1553207_at	0.0300503	0.662892		0.0560848	0.0647095		0.021094	0.822681
1553208_s_at	0.040229	0.714858		0.0938558	0.0369167		0.0194286	0.991501
1553209_at	0.0285109	0.600218		0.676443	0.00102784		0.0120831	0.272804
1553211_at	0.222513	0.224452		0.0428608	0.108985		0.0155493	0.330116
1553212_at	0.0178956	0.326694		0.0692154	0.130162		0.0151795	0.698999
1553213_a_at	0.315929	0.819571		0.187735	0.0221227		0.0215546	0.275072
1553214_a_at	0.0113377	0.218227		0.0206886	0.811906		0.0137333	0.377995
1553215_s_at	0.0176979	0.627917		0.282556	0.151349		0.0090608	0.661093
1553216_at	0.0178094	0.011478		0.169379	0.609334		0.0249744	0.903497
1553217_s_at	0.0322819	0.470759		0.354853	0.125717		0.0642462	0.513276
1553218_a_at	0.994729	0.00058488		0.0647622	0.951656		0.699942	0.00290235
1553219_a_at	0.150616	0.0387081		0.168446	0.00391981		0.307141	0.00167384
1553220_at	0.0564299	0.0966469		0.7172	0.00386663		0.115963	0.0553765
1553221_at	0.287867	0.230676		0.0722738	0.257646		0.0293481	0.183994
1553222_at	0.0345176	0.585151		0.194637	0.00112969		0.0240469	0.351597
1553224_at	0.0215294	0.129841		0.0476826	0.244313		0.321133	0.313965
1553225_s_at	0.0343364	0.223896		0.499853	0.0127009		0.0291531	0.794876
1553226_at	0.233655	0.0461805		0.477247	0.0173097		0.130045	0.104304
1553227_s_at	0.0614735	0.409803		0.0751264	0.266603		0.449318	0.937448
1553228_at	0.0105653	0.258176		0.018899	0.147394		0.151533	0.0114356
1553229_at	0.0195178	0.470917		0.033514	0.183941		0.0507707	0.260326
1553232_at	0.0113442	0.976605		0.0508214	0.662507		0.0208589	0.838935
1553234_at	0.0711208	0.424091		0.0788517	0.729838		0.0160638	0.104004
1553235_at	0.0264257	0.388209		0.03751	0.213736		0.0219757	0.3463
1553237_x_at	0.0255444	0.23115		0.225266	0.253832		0.0108809	0.466148
1553238_a_at	0.0293955	0.323195		0.230165	0.289101		0.0101069	0.851627
1553239_at	0.013575	0.268949		0.112653	0.100413		0.0307706	0.359132
1553241_at	0.072847	0.015219		0.260015	0.0180056		0.201406	0.0270406
1553243_at	0.0111483	0.870887		0.0593426	0.658286		0.0543925	0.126888
1553244_at	0.02075	0.739628		0.0370424	0.0563176		0.0123684	0.580419
1553246_a_at	0.327865	0.0869011		0.0632766	0.359171		0.0398051	0.237856
1553247_a_at	0.00730993	0.640775		0.110146	0.520547		0.0132995	0.712224
1553248_at	0.0118704	0.633326		0.0347678	0.658903		0.0122924	0.437344
1553249_at	0.0476668	0.044481		0.015684	0.293309		0.00720812	0.430478
1553252_a_at	0.046242	0.670924		0.0958985	0.0431593		0.0137799	0.309899
1553253_at	0.0423619	0.484786		0.491288	0.0184653		0.088933	0.0288001
1553254_at	0.0234286	0.0907448		0.560653	0.0170818		0.013349	0.984214
1553255_at	0.0106662	0.733327		0.0272583	0.00281502		0.0202292	0.0595942
1553257_at	0.0309243	0.578204		0.924414	0.0135785		0.0131501	0.833756
1553258_at	0.0174091	0.646814		0.027963	0.0419104		0.0272218	0.273523
1553260_s_at	0.0291317	0.964197		0.64719	0.0171953		0.148195	0.000813971
1553261_x_at	0.11269	0.216981		0.151442	0.354966		0.01026	0.5311
1553262_a_at	0.147725	0.561472		0.308467	0.0255829		0.222794	0.155204
1553263_at	0.0188023	0.769052		0.174673	0.00328421		0.0104708	0.867656
1553264_a_at	0.0140732	0.746894		0.122894	0.0200363		0.0144552	0.147554
1553265_at	0.0200769	0.390271		0.0611353	0.328029		0.229115	0.0051283
1553266_at	0.0560558	0.131566		0.0560462	0.623239		0.102658	0.104291
1553267_a_at	0.114721	0.441196		0.182731	0.0924362		0.0278038	0.433451
1553268_at	0.0345487	0.766935		0.852682	0.00261387		0.201488	0.0185951
1553269_at	0.214059	0.0373921		0.106091	0.0887009		0.112488	0.0226613
1553271_at	0.106292	0.158547		0.0661199	0.17531		0.630218	0.200638
1553272_at	0.0271122	0.108717		0.0604499	0.0464221		0.0727806	0.155545
1553274_a_at	0.0359306	0.983678		0.0602443	0.0157726		0.0239892	0.53033
1553275_s_at	0.0221177	0.878649		0.118593	0.545364		0.125955	0.858054
1553276_at	0.110201	0.0901653		0.0321057	0.122328		0.0296642	0.273873
1553277_at	0.0102112	0.375219		0.0787023	0.502284		0.121134	0.00400718
1553279_at	0.0868733	0.0662324		0.0741507	0.166857		0.0104941	0.503209
1553280_at	0.39548	0.0520014		0.061175	0.983225		0.200077	0.000299693
1553281_at	0.283684	0.127229		0.628388	0.00749128		0.0123227	0.795236
1553282_at	0.0774935	0.295086		0.230364	0.148072		0.0102825	0.245823
1553284_s_at	0.100247	0.253934		0.067758	0.148079		0.0219662	0.164065
1553285_s_at	0.185111	0.121765		0.04987	0.771398		0.725216	0.00042635
1553286_at	0.0722215	0.116529		0.215583	0.360732		0.0119564	0.597923
1553288_a_at	0.0108125	0.938096		0.356999	0.121841		0.0134129	0.924547
1553292_s_at	0.93256	0.0725812		0.0691992	0.054219		0.0161033	0.868717
1553293_at	0.998842	0.000357384		0.946246	0.00469697		0.0881509	0.0651811
1553295_at	0.00938127	0.339587		0.783767	0.0118552		0.035651	0.127658
1553296_at	0.103159	0.256702		0.836648	0.00125854		0.0151351	0.812731
1553297_a_at	0.050768	0.298904		0.321967	0.0319727		0.0149668	0.57201
1553298_at	0.0782696	0.0212866		0.0229586	0.0842589		0.0783193	0.24879
1553299_at	0.124895	0.40579		0.0670149	0.325469		0.0460229	0.262209
1553300_a_at	0.0529615	0.80136		0.189496	0.0868384		0.595691	0.166437
1553301_a_at	0.0495267	0.121542		0.557916	0.141572		0.0175	0.605114
1553303_at	0.0364394	0.929869		0.0439372	0.19642		0.0105403	0.845035
1553304_at	0.0443891	0.472612		0.130209	0.00372294		0.0185863	0.574779
1553306_at	0.0188367	0.215617		0.0846855	0.732607		0.119184	0.0690003
1553310_at	0.00975446	0.593837		0.0333506	0.941888		0.0233575	0.266319
1553311_at	0.0167927	0.175443		0.0463188	0.0209691		0.0124476	0.65875
1553313_s_at	0.0281258	0.195051		0.0412214	0.186045		0.621139	0.00442412
1553314_a_at	0.0491727	0.298565		0.0578323	0.0414632		0.0150382	0.594095
1553315_at	0.0152653	0.890114		0.0396422	0.76348		0.0282615	0.155013
1553316_at	0.198278	0.183073		0.105767	0.0457125		0.0893427	0.364399
1553317_s_at	0.00975756	0.935229		0.063554	0.614592		0.0108574	0.685383
1553318_at	0.0310085	0.596574		0.0775398	0.287583		0.0632654	0.0808128
1553319_at	0.0178555	0.943182		0.037182	0.0362722		0.0159513	0.587336
1553320_s_at	0.0120825	0.647535		0.0261789	0.23479		0.00933029	0.136401
1553321_a_at	0.0258756	0.198932		0.506104	0.171017		0.0294797	0.257797
1553322_s_at	0.0392375	0.54554		0.0750561	0.0936373		0.0164322	0.654972
1553323_a_at	0.0128246	0.621939		0.0323813	0.57586		0.0157135	0.296795
1553325_at	0.0658471	0.104771		0.0780156	0.331771		0.0199598	0.0315602
1553326_at	0.0394628	0.67216		0.480318	0.0200231		0.0108061	0.321115
1553327_a_at	0.0252541	0.432405		0.0716128	0.141998		0.0226838	0.289844
1553328_a_at	0.0193259	0.734512		0.579183	0.00908435		0.0272817	0.341792
1553329_at	0.010546	0.913686		0.0778307	0.263798		0.0156281	0.141486
1553330_at	0.105122	0.447737		0.0642428	0.0951832		0.0108744	0.438951
1553333_at	0.0626772	0.172276		0.196828	0.0255034		0.0113966	0.206169
1553335_x_at	0.214499	0.0416512		0.181507	0.0244946		0.0222191	0.778156
1553336_a_at	0.0214791	0.0295013		0.0320706	0.614395		0.0130061	0.0788372
1553338_at	0.033239	0.153319		0.0561948	0.00838095		0.0100059	0.0670492
1553340_s_at	0.089156	0.0630231		0.109524	0.00724783		0.0418855	0.719009
1553341_at	0.011956	0.688087		0.080005	0.426153		0.0263643	0.644126
1553344_at	0.00928558	0.340536		0.0271694	0.555125		0.0243361	0.19788
1553346_a_at	0.0119538	0.706375		0.0737721	0.222127		0.0156029	0.383163
1553347_s_at	0.0298951	0.574795		0.0508713	0.123877		0.019245	0.881467
1553348_a_at	0.292546	0.0302914		0.252847	0.018853		0.0223372	0.612427
1553349_at	0.032483	0.836941		0.0682013	0.782594		0.421304	0.798212
1553350_at	0.0149382	0.927798		0.766332	0.0620698		0.0746491	0.170529
1553351_at	0.11091	0.103257		0.113348	0.068435		0.317833	0.00540145
1553352_x_at	0.101761	0.183294		0.0724579	0.134955		0.0975209	0.0185501
1553354_a_at	0.187668	0.00355757		0.133476	0.0529414		0.0378835	0.591018
1553355_at	0.024028	0.863606		0.460585	0.0213084		0.0276542	0.131341
1553356_at	0.00898797	0.993074		0.976241	0.00828859		0.0123518	0.304191
1553357_at	0.0206835	0.588008		0.0686842	0.0677948		0.00666001	0.435124
1553359_at	0.15328	0.254066		0.0526771	0.0124696		0.168771	0.058485
1553361_x_at	0.0308918	0.0928544		0.0418	0.031896		0.0589746	0.159353
1553362_at	0.0155566	0.444176		0.0272494	0.821816		0.336645	0.000871233
1553363_at	0.0197838	0.152633		0.260392	0.441864		0.0164949	0.89131
1553364_at	0.0271013	0.715033		0.51565	0.0434509		0.0115976	0.687628
1553365_at	0.0411382	0.227512		0.0578098	0.00706265		0.014112	0.693242
1553366_s_at	0.0487141	0.361167		0.444112	0.012353		0.0199065	0.396982
1553367_a_at	0.311276	0.0696354		0.0485068	0.0994024		0.297615	0.0166846
1553369_at	0.0304192	0.730355		0.711289	0.0218774		0.0321408	0.0165553
1553371_at	0.0299419	0.870207		0.287879	0.0771285		0.0127635	0.466323
1553372_at	0.0136643	0.137168		0.0458318	0.691444		0.0190816	0.753798
1553373_at	0.0469183	0.13351		0.0489778	0.558765		0.0350351	0.11744
1553374_at	0.015251	0.201182		0.0287926	0.884633		0.0193299	0.0304519
1553375_at	0.0278813	0.354756		0.0708659	0.00516901		0.0363207	0.878582
1553376_a_at	0.0558597	0.0372712		0.474179	0.032098		0.0114483	0.830481
1553378_a_at	0.0289093	0.805678		0.286955	0.151595		0.014245	0.771678
1553380_at	0.0566565	0.212912		0.084418	0.862446		0.0248399	0.622588
1553383_at	0.0472556	0.871218		0.111785	0.0774288		0.0393565	0.0943232
1553385_at	0.0232225	0.676427		0.170714	0.0515891		0.0678608	0.131768
1553386_at	0.0120317	0.598731		0.165065	0.167492		0.0253389	0.0388035
1553387_at	0.00739946	0.213949		0.0209927	0.224127		0.167319	0.159461
1553388_at	0.022407	0.2063		0.217856	0.490201		0.0167982	0.493896
1553389_at	0.175272	0.306821		0.0746073	0.575611		0.0636972	0.177787
1553390_at	0.0573553	0.205226		0.0346105	0.094463		0.015966	0.502097
1553391_at	0.0419717	0.343899		0.72544	0.0277906		0.0373168	0.625266
1553392_at	0.028876	0.355485		0.563976	0.0460649		0.0643271	0.163457
1553394_a_at	0.0264634	0.526027		0.0578558	0.99386		0.0696459	0.0884014
1553395_a_at	0.0196135	0.698317		0.6865	0.0111604		0.0495775	0.390689
1553396_a_at	0.00530552	0.957456		0.0196834	0.534086		0.0163518	0.187405
1553397_at	0.105535	0.105992		0.276286	0.00555186		0.118996	0.105256
1553398_at	0.017013	0.180642		0.192694	0.196878		0.00908522	0.738765
1553399_a_at	0.0180598	0.164907		0.0406795	0.00871943		0.276426	0.0189811
1553400_a_at	0.346916	0.073151		0.113298	0.0369828		0.173533	0.00341345
1553401_at	0.0116154	0.401783		0.021162	0.648532		0.0150534	0.783078
1553402_a_at	0.0613818	0.770315		0.0485868	0.466777		0.0176317	0.523315
1553403_at	0.0222814	0.745209		0.11581	0.0941593		0.0172822	0.186966
1553405_a_at	0.0721071	0.806334		0.0867345	0.232889		0.0108375	0.718623
1553407_at	0.042105	0.249964		0.0675477	0.0831286		0.0915454	0.431007
1553409_at	0.514843	0.0428049		0.0492689	0.169637		0.00767987	0.113549
1553410_a_at	0.0365634	0.61693		0.266049	0.273752		0.0127624	0.369859
1553411_s_at	0.0358214	0.601595		0.171394	0.155673		0.017207	0.677617
1553412_at	0.0319443	0.0685131		0.067484	0.0991355		0.0598723	0.590033
1553413_at	0.999002	0.012547		0.174451	0.412656		0.140022	0.0218046
1553415_at	0.0124955	0.239734		0.0284846	0.0250698		0.0492833	0.012574
1553417_at	0.117332	0.217223		0.769673	0.00827841		0.0387021	0.113039
1553418_a_at	0.126565	0.119449		0.349398	0.692941		0.0171541	0.638469
1553420_at	0.0933804	0.0542045		0.638159	0.00544784		0.00787245	0.843537
1553422_s_at	0.0227152	0.454364		0.512906	0.111216		0.0475225	0.0456205
1553423_a_at	0.0176837	0.0882144		0.0610961	0.663439		0.870826	0.00607426
1553424_at	0.022304	0.981516		0.254815	0.26629		0.0104279	0.921961
1553425_at	0.0106951	0.339334		0.048184	0.540775		0.0224666	0.872003
1553426_at	0.0192332	0.838183		0.18298	0.0308349		0.0152619	0.623315
1553427_at	0.148164	0.0131133		0.0593344	0.010967		0.0376831	0.438415
1553428_at	0.0294063	0.400957		0.0726545	0.237835		0.0181716	0.882011
1553429_at	0.0106276	0.905179		0.0360484	0.487262		0.0447816	0.144322
1553430_a_at	0.895091	0.0278568		0.0424772	0.543786		0.0663908	0.232343
1553432_s_at	0.0191491	0.762656		0.800673	0.00839927		0.00894283	0.395046
1553433_at	0.0168385	0.403415		0.0529786	0.117915		0.0164464	0.545688
1553434_at	0.0411444	0.330108		0.137549	0.0732574		0.0142794	0.51938
1553435_at	0.0380118	0.965403		0.315911	0.0376194		0.0603236	0.0258478
1553436_at	0.0416538	0.0716217		0.0671677	0.0400025		0.0145711	0.539553
1553437_at	0.173794	0.199337		0.370984	0.0216104		0.0107376	0.608953
1553438_at	0.0416082	0.240187		0.0864527	0.0200988		0.0114629	0.966066
1553439_at	0.0367065	0.980171		0.0814408	0.0159919		0.0434441	0.12417
1553440_at	0.0609401	0.130472		0.0263298	0.663671		0.0142648	0.393777
1553441_at	0.00685973	0.411501		0.0171718	0.890293		0.181137	0.0268103
1553442_a_at	0.0944451	0.197282		0.072219	0.606657		0.085203	0.01729
1553443_at	0.0234303	0.938472		0.0458787	0.0166942		0.0106789	0.552706
1553444_a_at	0.0575522	0.306304		0.40837	0.028662		0.00982538	0.449874
1553446_at	0.0125609	0.605743		0.030974	0.595716		0.021251	0.983407
1553447_at	0.0158377	0.0962611		0.0553334	0.576275		0.0251879	0.145005
1553448_at	0.0670285	0.0604561		0.167217	0.363914		0.0210883	0.0465414
1553449_at	0.0135994	0.690805		0.995664	0.0072529		0.0178862	0.596815
1553450_s_at	0.015861	0.535215		0.735038	0.150944		0.0127254	0.332812
1553451_at	0.0327558	0.723853		0.465425	0.13364		0.0215256	0.304073
1553452_at	0.0769914	0.0863828		0.0779325	0.053552		0.18078	0.0602586
1553453_at	0.256973	0.0676216		0.409558	0.222305		0.0153571	0.21673
1553454_at	0.0357007	0.914906		0.519033	0.0548862		0.197401	0.0132739
1553456_at	0.0407383	0.605359		0.277536	0.00106885		0.0402535	0.475659
1553457_at	0.0288362	0.697413		0.17605	0.394373		0.0178821	0.612737
1553458_at	0.0446456	0.688561		0.183148	0.00868899		0.00936682	0.534861
1553459_at	0.581068	0.0130047		0.932759	0.0037948		0.0159906	0.814995
1553460_at	0.00824459	0.976078		0.999992	0.00135972		0.0247954	0.981128
1553461_at	0.0193086	0.202771		0.0407301	0.482133		0.0644205	0.126938
1553462_at	0.0138392	0.760162		0.0310121	0.299818		0.0104994	0.313496
1553464_at	0.0422337	0.785081		0.286171	0.0312593		0.0279674	0.0782077
1553465_a_at	0.0342577	0.113573		0.180275	0.0681693		0.051432	0.247079
1553466_at	0.0331427	0.332619		0.655391	0.023184		0.164286	0.131004
1553467_at	0.0794767	0.29881		0.273908	0.018484		0.0195524	0.658456
1553468_at	0.0289411	0.968696		0.0572229	0.103375		0.0480201	0.424401
1553470_at	0.027797	0.88163		0.153196	0.0660731		0.0452935	0.050496
1553471_at	0.0237196	0.554976		0.0479239	0.130685		0.033255	0.384803
1553472_at	0.00738766	0.997456		0.0231871	0.740918		0.0081877	0.796137
1553474_at	0.00954133	0.787313		0.0218716	0.887702		0.0193812	0.59812
1553475_at	0.0137934	0.736352		0.312179	0.149287		0.00986248	0.602724
1553478_at	0.706862	0.0291108		0.947112	0.000890851		0.0147763	0.557508
1553479_at	0.0257313	0.434833		0.354235	0.0219596		0.0106019	0.752852
1553482_at	0.155945	0.189479		0.145952	0.0408492		0.00853609	0.150378
1553483_at	0.0144915	0.575031		0.024279	0.220015		0.0105499	0.919172
1553484_at	0.0110619	0.909947		0.691792	0.00410604		0.0138427	0.689155
1553485_at	0.0192093	0.973499		0.101553	0.125355		0.0130023	0.401384
1553486_a_at	0.206694	0.0110986		0.190569	0.0956947		0.0143239	0.471787
1553488_at	0.0189458	0.664139		0.229959	0.161294		0.0122941	0.627125
1553489_a_at	0.0407297	0.86038		0.0886922	0.247789		0.0168161	0.513917
1553491_at	0.0160078	0.782755		0.166189	0.134164		0.0288889	0.0967686
1553492_a_at	0.103393	0.52789		0.0642227	0.530326		0.0231034	0.122132
1553493_a_at	0.0466808	0.0755302		0.674695	0.0386336		0.0877674	0.244718
1553494_at	0.0121018	0.734917		0.0904998	0.415079		0.080194	0.361568
1553497_at	0.0585256	0.173522		0.840129	0.0248915		0.0133031	0.967419
1553498_at	0.0115957	0.944905		0.43447	0.118741		0.0192904	0.530006
1553499_s_at	0.0188668	0.512535		0.0900047	0.0164438		0.00768104	0.493002
1553500_at	0.0228832	0.856663		0.0398291	0.565509		0.016016	0.412645
1553502_a_at	0.0192106	0.432111		0.0293241	0.769395		0.0135697	0.963198
1553504_at	0.060647	0.177361		0.785449	0.0472619		0.0189684	0.450503
1553505_at	0.979514	2.46004e-05		0.0707967	0.00580001		0.0124251	0.139834
1553506_at	0.114182	0.0885688		0.423947	0.309		0.0261755	0.370314
1553507_a_at	0.119908	0.212243		0.283127	0.0337029		0.0111246	0.759166
1553508_at	0.00741053	0.661849		0.447963	0.146622		0.0178925	0.706536
1553510_s_at	0.909208	0.00931852		0.828926	0.0126725		0.239375	0.00024164
1553511_at	0.0280777	0.329426		0.716821	0.0249536		0.0144657	0.368121
1553512_at	0.0189555	0.733365		0.270645	0.187324		0.0270262	0.92145
1553513_at	0.0106831	0.430853		0.115649	0.0497801		0.0107549	0.258933
1553514_a_at	0.0192407	0.686984		0.0960692	0.97734		0.0229206	0.248626
1553515_at	0.024685	0.693904		0.13715	0.109305		0.013247	0.713911
1553517_at	0.0192252	0.289708		0.0427462	0.0469014		0.0119036	0.828236
1553518_at	0.016643	0.618938		0.105571	0.0955057		0.00768731	0.423801
1553519_at	0.0170192	0.7574		0.0510779	0.610179		0.00979571	0.573192
1553521_at	0.0205801	0.601804		0.137597	0.0657542		0.0149609	0.302801
1553523_at	0.0245438	0.61357		0.0420086	0.0170632		0.14869	0.0797228
1553524_at	0.00922742	0.686716		0.0991868	0.303307		0.0145096	0.882679
1553525_at	0.0124201	0.75672		0.926738	0.0114465		0.0451123	0.554929
1553526_at	0.0289138	0.773568		0.253779	0.0141772		0.0696724	0.19075
1553527_at	0.0364106	0.00561519		0.941746	0.0159105		0.0169046	0.066045
1553528_a_at	0.0340727	0.699016		0.134178	0.196029		0.165825	0.675628
1553529_at	0.0369398	0.43469		0.428718	0.0145345		0.0245046	0.185352
1553530_a_at	0.160003	0.278346		0.101747	0.169609		0.135872	0.427086
1553531_at	0.0116019	0.261974		0.075047	0.783801		0.010974	0.670215
1553532_a_at	0.0208601	0.654664		0.603205	0.00273473		0.0279584	0.140529
1553533_at	0.0142546	0.193606		0.0338401	0.217107		0.0349316	0.0746098
1553534_at	0.402652	0.0136085		0.0952895	0.128508		0.0164438	0.798755
1553535_a_at	0.629863	0.040425		0.299503	0.307121		0.00570526	0.00833259
1553536_at	0.0164247	0.859693		0.169223	0.0751218		0.140604	0.611792
1553537_at	0.0134449	0.367881		0.52161	0.0295392		0.0197695	0.295706
1553538_s_at	0.440397	0.112487		0.0366424	0.763585		0.512801	0.00850073
1553539_at	0.0466579	0.214514		0.426679	0.000712724		0.0108396	0.316341
1553540_a_at	0.0579582	0.701955		0.0653636	0.0610926		0.0204067	0.366846
1553541_at	0.522867	0.0411372		0.995311	0.0022865		0.135996	0.0437737
1553542_at	0.0152839	0.972208		0.112039	0.148919		0.0170823	0.250859
1553544_at	0.188154	0.652554		0.106754	0.0223808		0.0133199	0.802329
1553545_at	0.0610617	0.473199		0.140425	0.0148733		0.255684	0.0277652
1553546_at	0.0241868	0.807057		0.0157715	0.432399		0.00733452	0.866212
1553547_at	0.0107673	0.457502		0.062304	0.113607		0.0218711	0.9732
1553549_at	0.0561534	0.333986		0.232259	0.00232218		0.0882588	0.0510197
1553550_at	0.0265024	0.631789		0.632241	0.0729079		0.0218541	0.227784
1553551_s_at	0.438235	0.0405711		0.131899	0.0188776		0.0521695	0.16704
1553552_at	0.0205098	0.143078		0.810974	0.375501		0.0490062	0.251067
1553553_at	0.0389364	0.254274		0.074406	0.0973794		0.0163005	0.446001
1553555_at	0.0215012	0.319789		0.13818	0.0159446		0.0220579	0.250698
1553556_at	0.029364	0.195891		0.309237	0.628249		0.0324442	0.102762
1553558_at	0.240216	0.456169		0.517914	0.00305204		0.0131027	0.821305
1553559_at	0.0328069	0.241506		0.104259	0.0721642		0.048314	0.260014
1553560_at	0.105388	0.285809		0.291553	0.0397978		0.0153781	0.663017
1553561_at	0.162761	0.450772		0.243613	0.0642614		0.0132632	0.410012
1553562_at	0.0254301	0.879764		0.0986536	0.0383999		0.0212074	0.338815
1553564_at	0.690859	0.151369		0.0395153	0.560101		0.0115959	0.293145
1553565_s_at	0.0439789	0.112626		0.0428587	0.818015		0.340596	0.0374071
1553566_at	0.0134713	0.879234		0.935867	0.00141947		0.0238032	0.259993
1553567_s_at	0.104444	0.191146		0.050346	0.723556		0.966334	0.00084177
1553568_a_at	0.0898893	0.27121		0.104604	0.0222826		0.022224	0.380419
1553569_at	0.386829	0.0180152		0.039558	0.0196975		0.98518	1.23367e-05
1553570_x_at	0.266283	0.0300585		0.0399277	0.0518034		0.969331	0.000341128
1553572_a_at	0.0211517	0.725951		0.0308104	0.455282		0.0365777	0.410643
1553573_s_at	0.0231045	0.510435		0.226207	0.0513863		0.0178443	0.999185
1553574_at	0.369857	0.274893		0.153613	0.920625		0.0255355	0.438072
1553575_at	0.0759601	0.00197843		0.159482	0.00363878		0.0153959	0.385349
1553579_a_at	0.389946	0.0369094		0.396046	0.147051		0.0105046	0.342043
1553581_s_at	0.0791251	0.826052		0.126027	0.0316532		0.247211	0.694786
1553582_a_at	0.0174077	0.992588		0.0379838	0.993207		0.0177732	0.20138
1553583_a_at	0.0122846	0.667133		0.0483067	0.0438138		0.0165788	0.538918
1553584_at	0.0860719	0.459697		0.64481	0.0134215		0.0231142	0.267749
1553585_a_at	0.601906	0.269974		0.218397	0.0244265		0.0338886	0.339554
1553586_at	0.0946893	0.0444802		0.136282	0.0710359		0.0299366	0.0626908
1553587_a_at	1	0.234638		0.0282521	0.0742075		0.94991	0.000191929
1553588_at	0.0577372	0.0243128		0.0242027	0.013993		0.0233171	0.358767
1553589_a_at	0.143159	0.000630923		0.0659894	0.00818218		0.820503	0.000550182
1553590_at	0.0114115	0.854586		0.0263224	0.209063		0.0152873	0.185117
1553591_at	0.0182063	0.895853		0.951973	0.00183801		0.0543822	0.217138
1553592_x_at	0.0332735	0.912323		0.301018	0.0848168		0.0753311	0.0662209
1553593_a_at	0.0338607	0.283728		0.0458018	0.101852		0.0175855	0.465917
1553594_a_at	0.136042	0.279316		0.711092	0.040446		0.0604549	0.117101
1553599_a_at	0.0434979	0.382532		0.278274	0.0487098		0.104432	0.0569445
1553600_at	0.014649	0.444706		0.0462619	0.101887		0.0200529	0.30469
1553601_a_at	0.0206696	0.704469		0.621312	0.0117925		0.127657	0.0356037
1553602_at	0.0187612	0.77409		0.646001	0.160388		0.0219586	0.592523
1553603_s_at	0.09995	0.70239		0.172416	0.0294274		0.880361	0.357979
1553604_at	0.0114544	0.267227		0.133983	0.750261		0.367989	0.00455832
1553605_a_at	0.195573	0.0155881		0.169421	0.610362		0.0845714	0.0224304
1553607_at	0.0456145	0.43948		0.0347991	0.935057		0.00824393	0.937938
1553608_a_at	0.00588265	0.663431		0.0193596	0.588172		0.0151102	0.709312
1553611_s_at	0.0614517	0.604958		0.0498763	0.110315		0.443091	0.0370611
1553612_at	0.031852	0.244511		0.0374995	0.370914		0.0148267	0.102448
1553613_s_at	0.831838	0.018738		0.106026	0.711388		0.943276	8.54504e-05
1553614_a_at	0.0820393	0.0281822		0.134784	0.537067		0.00926971	0.856975
1553618_at	0.00985243	0.415276		0.0533742	0.496153		0.0108808	0.785997
1553619_a_at	0.0300618	0.737331		0.15796	0.0469332		0.00991463	0.750187
1553620_at	0.0380244	0.358904		0.147868	0.262709		0.0435383	0.114734
1553622_a_at	0.591205	0.00658665		0.259484	0.00570147		0.0391618	0.267242
1553623_at	0.0204587	0.372506		0.0749123	0.0171377		0.0224728	0.508412
1553625_at	0.0220004	0.12082		0.0746122	0.275355		0.0088574	0.675321
1553626_a_at	0.0163589	0.555903		0.0601464	0.0029665		0.0208668	0.73365
1553627_s_at	0.0491145	0.0562432		0.044054	0.425254		0.0565591	0.183947
1553629_a_at	0.0253072	0.90224		0.403211	0.0642278		0.0157429	0.370977
1553630_at	0.236334	0.0139796		0.0930342	0.00065574		0.135259	0.000756758
1553633_s_at	0.0417268	0.0984459		0.159383	0.253673		0.00825919	0.981184
1553634_a_at	0.0585506	0.372341		0.342477	0.0103814		0.0114541	0.65185
1553635_s_at	0.014846	0.821716		0.284033	0.195558		0.100648	0.0522308
1553636_at	0.0252226	0.900298		0.227045	0.0299725		0.0108705	0.567672
1553637_s_at	0.0154424	0.280496		0.401405	0.353545		0.0138485	0.511689
1553639_a_at	0.131769	0.327505		0.0311554	0.688866		0.0644111	0.408698
1553640_at	0.0142823	0.465221		0.811736	0.00479532		0.0252881	0.132194
1553641_a_at	0.0227265	0.757452		0.384021	0.0597873		0.00991844	0.32239
1553642_at	0.00854165	0.809286		0.131655	0.0520425		0.0622586	0.0866569
1553644_at	0.0906657	0.314392		0.270724	0.00170004		0.0150943	0.670936
1553645_at	0.0256883	0.301084		0.0688921	0.665341		0.0206121	0.378378
1553646_at	0.0335456	0.24777		0.0630044	0.149719		0.549048	0.00259541
1553647_at	0.13267	0.14881		0.516681	0.0385532		0.00976007	0.675757
1553651_at	0.0147954	0.331199		0.021495	0.213565		0.380978	0.00838426
1553652_a_at	0.122197	0.33456		0.171567	0.420917		0.141065	0.00939155
1553654_at	0.106068	0.462325		0.14103	0.129567		0.202056	0.00205919
1553655_at	0.165715	0.134516		0.968974	0.0112565		0.0142175	0.921361
1553656_at	0.0458533	0.0675528		0.028398	0.970602		0.00979434	0.513528
1553657_at	0.0249881	0.627628		0.226173	0.0892316		0.0152173	0.773882
1553658_at	0.886341	0.323056		0.021444	0.0286736		0.0139354	0.45215
1553660_at	0.0204304	0.930327		0.0987105	0.702883		0.0107597	0.767424
1553661_a_at	0.515042	0.00784182		0.0703262	0.839241		0.0105065	0.550323
1553663_a_at	0.0146604	0.999301		0.181854	0.0284821		0.00964889	0.809131
1553666_at	0.129096	0.150722		0.0555311	0.130646		0.159609	0.103087
1553668_at	0.177317	0.138814		0.0576335	0.0766661		0.0174723	0.465159
1553670_at	0.0315471	0.399359		0.214008	0.0047041		0.01204	0.706444
1553672_at	0.0670643	0.0703488		0.121358	0.55377		0.0906126	0.0392511
1553673_at	0.0937246	0.227741		0.0791118	0.243061		0.015459	0.520217
1553674_at	0.0183612	0.14648		0.0803018	0.806283		0.0204087	0.100264
1553675_at	0.153297	0.133601		0.711934	0.0325033		0.0132848	0.397182
1553677_a_at	0.0225567	0.992742		0.184821	0.0103548		0.776633	4.29901e-06
1553678_a_at	0.149917	0.326467		0.0735503	0.13194		0.226101	0.573506
1553679_s_at	0.0244443	0.299811		0.158164	0.0420692		0.0211816	0.172238
1553681_a_at	0.0490721	0.200518		0.82184	0.0127322		0.0144926	0.752144
1553682_at	0.0521479	0.220112		0.445	0.0494495		0.0320365	0.801728
1553683_s_at	0.0117282	0.306228		0.038375	0.106346		0.191298	0.00712386
1553684_at	0.0137091	0.0208795		0.144375	0.0236678		0.0489668	0.139097
1553685_s_at	0.063064	0.00112374		0.0606377	0.159192		0.0256365	0.182555
1553686_at	0.0373599	0.766811		0.140742	0.213859		0.0107681	0.697334
1553688_at	0.0215776	0.180985		0.0561452	0.876315		0.0236871	0.220851
1553689_s_at	0.0505284	0.0472356		0.102153	0.0222864		0.23995	0.000232251
1553690_at	0.0955095	0.138036		0.0385518	0.157101		0.0199447	0.976434
1553691_at	0.0955997	0.0538679		0.323162	0.0019958		0.022739	0.10649
1553693_s_at	0.320518	0.201249		0.143572	0.36311		0.0672762	0.907862
1553694_a_at	0.0863889	0.985512		0.207644	0.0155241		0.0258408	0.189257
1553695_a_at	0.0403209	0.41783		0.268926	0.00249843		0.0664637	0.0146164
1553696_s_at	0.0155427	0.322133		0.0307885	0.440394		0.344213	0.000155394
1553697_at	0.940706	0.0204652		0.12983	0.328238		0.954362	0.00234946
1553698_a_at	0.416042	0.133496		0.0839595	0.0865181		0.672582	0.0158703
1553701_a_at	0.168357	0.130385		0.0893911	0.0413865		0.0323188	0.37794
1553702_at	0.00956371	0.386283		0.0459848	0.914208		0.0900926	0.102366
1553703_at	0.0529045	0.771571		0.0599607	0.0295372		0.101362	0.330198
1553704_x_at	0.0806099	0.614837		0.122555	0.0552164		0.150034	0.785916
1553705_a_at	0.0262608	0.981706		0.552724	0.00212855		0.676604	0.00639011
1553706_at	0.00749776	0.938681		0.0445938	0.350919		0.160356	0.184643
1553708_at	0.0253085	0.894542		0.0768651	0.0462911		0.0258923	0.674672
1553709_a_at	0.515917	0.00607658		0.48739	0.00265149		0.869453	0.0202472
1553710_at	0.0176568	0.399753		0.023963	0.653372		0.0159896	0.702359
1553711_a_at	0.0119128	0.191077		0.140853	0.00591922		0.0224868	0.0185135
1553713_a_at	0.0247363	0.286075		0.0759877	0.63748		0.0918519	0.152383
1553715_s_at	0.96428	0.0542142		0.151006	0.180263		0.0201462	0.0555002
1553717_at	0.112435	0.166981		0.134733	0.0938727		0.00724158	0.918045
1553718_at	0.0160532	0.6345		0.0293044	0.25069		0.479741	0.00840791
1553719_s_at	0.10534	0.471919		0.0495426	0.059807		0.248019	0.00210372
1553720_a_at	0.00710919	0.298494		0.0166621	0.244663		0.0106519	0.884716
1553721_at	0.0268054	0.090275		0.05502	0.0518831		0.706445	0.000159716
1553722_s_at	0.0815664	0.00112541		0.121002	0.00159702		0.968295	1.33615e-05
1553723_at	0.0812019	0.0118912		0.18432	0.00147272		0.0169387	0.899305
1553725_s_at	0.0484621	0.177186		0.129047	0.00483371		0.10765	0.418666
1553726_s_at	0.116477	0.21034		0.316316	0.190237		0.0387958	0.0876755
1553727_at	0.0155862	0.876902		0.038843	0.00980629		0.338156	0.00637098
1553728_at	0.179143	0.0440213		0.182391	0.00873627		0.0207437	0.636319
1553729_s_at	0.00824854	0.520333		0.0468883	0.992614		0.0100557	0.614151
1553730_x_at	0.0299397	0.346442		0.134127	0.041885		0.00952196	0.989142
1553732_s_at	0.00819543	0.734009		0.0371264	0.853961		0.0171592	0.884255
1553734_at	0.0341148	0.103885		0.455033	0.310844		0.0112194	0.855936
1553736_at	0.377837	0.0256108		0.0262122	0.264108		0.0202118	0.0431784
1553739_at	0.0339377	0.583311		0.0420629	0.260063		0.0322155	0.0415386
1553740_a_at	0.0652943	0.270567		0.102493	0.0991488		0.0109353	0.282128
1553741_at	0.0337009	0.727296		0.436236	0.0724281		0.0660087	0.130136
1553743_at	0.999989	0.0142772		0.0433899	0.592103		0.154213	0.0209634
1553746_a_at	0.0176559	0.493061		0.673506	0.223925		0.0140761	0.756318
1553747_at	0.0151723	0.746051		0.991303	0.0134736		0.0138647	0.33555
1553749_at	0.092641	0.129088		0.111995	0.562216		0.0640213	0.00197957
1553750_a_at	0.029565	0.549825		0.0456184	0.0255269		0.0916353	0.896839
1553752_at	0.0454257	0.27877		0.0924458	0.538112		0.103199	0.0349267
1553755_at	0.0101898	0.82411		0.837658	0.017344		0.128856	0.0164814
1553756_at	0.0169412	0.961391		0.914002	0.012253		0.0182297	0.0900899
1553757_at	0.085281	0.151123		0.0488513	0.388656		0.0188724	0.825494
1553759_at	0.0241926	0.16786		0.0831526	0.159599		0.0126756	0.231531
1553761_at	0.0824008	0.0575698		0.135591	0.222121		0.0218688	0.697653
1553764_a_at	0.133381	0.287444		0.236516	0.185633		0.333428	0.647121
1553765_a_at	0.00591989	0.500228		0.0412571	0.867682		0.0167841	0.162683
1553768_a_at	0.998446	0.0186491		0.533788	0.14972		0.312778	0.015455
1553769_at	0.0200894	0.194556		0.261878	0.363804		0.011401	0.969559
1553770_a_at	0.113658	0.465482		0.441662	0.0183873		0.0177506	0.441535
1553772_at	0.0112353	0.915565		0.0732969	0.459177		0.0172681	0.275581
1553775_at	0.0944779	0.188312		0.0940546	0.32907		0.0586535	0.0247086
1553776_at	0.00967033	0.636494		0.0260192	0.716158		0.0223076	0.778306
1553778_at	0.491612	0.0341694		0.0481809	0.162453		0.0890025	0.048569
1553780_at	0.0131866	0.297667		0.213665	0.024919		0.0752396	0.0664376
1553781_at	0.924417	0.00108388		0.42368	0.000688622		0.0304305	0.0330345
1553785_at	0.0589938	0.208911		0.609198	0.118085		0.00934471	0.928108
1553787_at	1	0.00135279		0.0536513	0.395199		0.253554	0.0246306
1553789_a_at	0.0387905	0.295774		0.166311	0.109593		0.0136895	0.918568
1553792_at	0.0392477	0.470993		0.220526	0.0284599		0.0185598	0.78083
1553793_a_at	0.0157358	0.711768		0.0467619	0.777889		0.0525892	0.749042
1553794_at	0.0270291	0.559162		0.176132	0.0542541		0.015908	0.494244
1553796_at	0.0634891	0.288963		0.914402	0.0107265		0.0552179	0.32926
1553797_a_at	0.0270228	0.547805		0.0436672	0.290952		0.0398602	0.104038
1553798_a_at	0.0368691	0.284996		0.192075	0.00896216		0.0136072	0.756359
1553799_at	0.128533	0.18898		0.0197061	0.816391		0.0140691	0.124182
1553801_a_at	0.965936	0.00864712		0.491947	0.017577		0.199604	0.0762143
1553802_a_at	0.0302903	0.790675		0.125203	0.209539		0.0119709	0.932034
1553803_at	0.214848	0.0572515		0.226081	0.00231526		0.0305287	0.356213
1553804_a_at	0.0133653	0.565396		0.0224512	0.968925		0.137675	0.0340912
1553805_at	0.021758	0.331943		0.813197	0.007101		0.00723075	0.633237
1553808_a_at	0.122328	0.176484		0.156577	0.245611		0.00756842	0.787896
1553809_a_at	0.0247872	0.661911		0.0568667	0.0490542		0.0131567	0.464149
1553810_a_at	0.909027	0.0068759		0.0388296	0.00796047		0.0148957	0.154124
1553811_at	0.0545893	0.760827		0.033045	0.359667		0.0148826	0.843434
1553812_at	0.0969329	0.922981		0.0578934	0.0147069		0.0175961	0.80701
1553813_s_at	0.034433	0.0791477		0.492066	0.0507034		0.015809	0.734915
1553815_a_at	0.0849157	0.471185		0.0395543	0.624404		0.0131909	0.468811
1553817_at	0.0222137	0.831678		0.816506	0.0436068		0.0164079	0.87715
1553818_x_at	0.00877857	0.39722		0.0262269	0.041865		0.0095343	0.952899
1553821_at	0.178323	0.0414484		0.0234634	0.356154		0.0135226	0.771253
1553822_at	0.00683478	0.804028		0.0799009	0.0745269		0.0128749	0.740195
1553823_a_at	0.0232105	0.930378		0.0523886	0.127445		0.012391	0.869898
1553826_a_at	0.0230717	0.919849		0.509423	0.00661751		0.00737643	0.884445
1553828_at	0.0121738	0.183965		0.0155637	0.0112991		0.0116036	0.739779
1553829_at	0.0971699	0.312614		0.278656	0.340977		0.00756907	0.194223
1553830_s_at	0.0228238	0.984211		0.197615	0.132935		0.0109179	0.101747
1553831_at	0.0108906	0.602321		0.355156	0.121508		0.0214474	0.0448953
1553832_at	0.0245788	0.550401		0.0503315	0.0511577		0.0118332	0.490451
1553834_at	0.042483	0.371431		0.0337658	0.667213		0.0166344	0.526153
1553835_a_at	0.026379	0.417641		0.204667	0.199875		0.0114317	0.915541
1553837_at	0.0857262	0.320167		0.8198	0.014828		0.0131004	0.190655
1553838_at	0.0295642	0.449037		0.439353	0.0262819		0.0129225	0.61027
1553839_at	0.0213132	0.305165		0.314309	0.0346119		0.0152653	0.276749
1553840_a_at	0.163283	0.447895		0.168582	0.074589		0.0137642	0.9047
1553842_at	0.0155666	0.596768		0.0552934	0.844694		0.145712	0.00585086
1553843_at	0.00761092	0.9672		0.039817	0.36333		0.0398835	0.0156315
1553844_a_at	0.0156908	0.96342		0.0434587	0.00584588		0.0975823	0.0926839
1553845_x_at	0.00557947	0.666301		0.898957	0.0540429		0.0338381	0.106274
1553846_at	0.177905	0.482635		0.0931522	0.245557		0.0296184	0.0255871
1553847_a_at	0.250292	0.28958		0.135202	0.0112538		0.019967	0.493684
1553849_at	0.0194125	0.589731		0.0353796	0.290412		0.0128844	0.92317
1553850_at	0.0314223	0.252391		0.0173214	0.35474		0.0344749	0.0545088
1553851_at	0.0164252	0.59566		0.0871491	0.340899		0.031623	0.171394
1553852_at	0.0153603	0.481058		0.0764317	0.786255		0.0350222	0.0599629
1553856_s_at	0.749306	0.00159304		0.978502	0.000817215		0.136803	0.022869
1553857_at	0.0601526	0.759634		0.0271819	0.0763714		0.010383	0.697239
1553858_at	0.0101017	0.376498		0.0209777	0.0364859		0.0100371	0.357695
1553859_at	0.020383	0.730856		0.397316	0.353684		0.0493542	0.284313
1553860_at	0.0528517	0.322287		0.287744	0.0282411		0.0268098	0.157077
1553861_at	0.0521564	0.746228		0.0947453	0.611276		0.0135132	0.334687
1553863_at	0.0140266	0.169942		0.0468822	0.0556913		0.00991174	0.890708
1553864_at	0.0134943	0.454248		0.0313974	0.345071		0.0190162	0.345986
1553865_a_at	0.0321502	0.161017		0.112711	0.315195		0.00746115	0.764436
1553868_a_at	0.0143673	0.455805		0.0389832	0.392928		0.820682	0.000162248
1553869_at	0.365301	0.0609015		0.0508864	0.275237		0.017222	0.282845
1553871_at	0.00518992	0.203718		0.0272952	0.0394224		0.0093759	0.70808
1553872_at	0.00653106	0.79437		0.0558616	0.202297		0.133474	0.0182506
1553873_at	0.0144196	0.572268		0.0293722	0.017586		0.0819773	0.0196997
1553874_a_at	0.0349369	0.868355		0.133053	0.0347208		0.0247066	0.970768
1553875_s_at	0.0152645	0.772227		0.0246461	0.0219965		0.0741744	0.307282
1553876_at	0.0470255	0.408161		0.170552	0.0176523		0.00787118	0.968379
1553878_at	0.0191493	0.199558		0.227119	0.012033		0.010334	0.359269
1553879_a_at	0.0445312	0.377157		0.0304847	0.467553		0.0467651	0.210043
1553880_at	0.0144258	0.836549		0.0485424	0.569007		0.0508593	0.274949
1553881_at	0.04606	0.422937		0.567736	0.00588703		0.0226339	0.817631
1553882_at	0.0160663	0.989639		0.0449174	0.312956		0.0135463	0.434053
1553883_at	0.0183007	0.852235		0.0350903	0.634105		0.0134877	0.239081
1553885_x_at	0.0109181	0.125462		0.0186574	0.235054		0.00854475	0.50183
1553886_at	0.0175053	0.102435		0.343568	0.153052		0.00787557	0.093852
1553887_at	0.268314	0.0285481		0.0478469	0.428358		0.0154016	0.47958
1553888_at	0.0192999	0.56315		0.0746852	0.278509		0.038976	0.144604
1553889_at	0.0212714	0.931564		0.239406	0.0345094		0.0131726	0.929638
1553890_s_at	0.0315494	0.308088		0.0662566	0.0588008		0.0646299	0.210486
1553891_at	0.0156352	0.78566		0.0674118	0.0688589		0.0152687	0.739029
1553893_at	0.0171546	0.639606		0.589685	0.12814		0.147697	0.0203729
1553894_at	0.794729	0.0604305		0.167845	0.186919		0.0209677	0.702923
1553895_at	0.0214799	0.556981		0.213439	0.0476465		0.140173	0.115042
1553898_a_at	0.0464016	7.30447e-05		0.257386	0.0134038		0.010798	0.799044
1553900_s_at	0.15496	0.633852		0.0275479	0.0382889		0.0385951	0.117173
1553901_x_at	0.0238046	0.255833		0.0505552	0.0936523		0.019832	0.329761
1553905_at	0.011436	0.774197		0.0395015	0.92339		0.0125398	0.554537
1553906_s_at	0.243518	0.160125		0.0697335	0.0602581		0.0140605	0.323736
1553907_a_at	0.0596923	0.289137		0.0432234	0.76632		0.0991139	0.741498
1553909_x_at	0.023484	0.492702		0.0895204	0.584706		0.0752847	0.736781
1553910_at	0.0205212	0.602917		0.0322679	0.433145		0.0183039	0.423344
1553911_at	0.020492	0.630662		0.218461	0.195312		0.0239642	0.710706
1553912_at	0.0607983	0.412355		0.170462	0.122895		0.0203145	0.610799
1553914_at	0.025202	0.380577		0.901785	0.00130102		0.0165459	0.330852
1553915_at	0.00500764	0.651946		0.0201754	0.942878		0.0113714	0.388197
1553917_at	0.13938	0.0375268		0.123369	0.148338		0.0239547	0.37308
1553918_at	0.198783	0.0832306		0.351964	0.107976		0.0116288	0.908381
1553919_at	0.0390743	0.256362		0.809868	0.0209796		0.0180382	0.154452
1553920_at	0.0378315	0.203156		0.0780473	0.499092		0.0216854	0.103188
1553923_at	0.0231296	0.120961		0.152937	0.0790063		0.16996	0.146599
1553924_at	0.0298021	0.663213		0.397895	0.174182		0.0193802	0.811895
1553927_at	0.0133188	0.307237		0.466606	0.0215202		0.0233431	0.700204
1553928_at	0.0664866	0.639434		0.101856	0.314639		0.0350932	0.019769
1553929_at	0.115016	0.516308		0.239846	0.198		0.00956116	0.359318
1553930_at	0.0121428	0.493487		0.273481	0.221518		0.0389064	0.269565
1553931_at	0.0119227	0.236245		0.0148487	0.0273629		0.0108622	0.839398
1553934_at	0.104423	0.140125		0.0542538	0.732609		0.0160524	0.0599141
1553935_at	0.0200267	0.810453		0.876304	0.0167838		0.0102434	0.50445
1553936_a_at	0.0432193	0.788137		0.0806806	0.434732		0.00879897	0.109509
1553938_a_at	0.00660371	0.0674877		0.0139489	0.0268905		0.243326	0.0224627
1553940_a_at	0.999996	0.00468161		0.0259273	0.055549		0.773301	0.00652956
1553943_at	0.115555	0.580752		0.13503	0.00670403		0.0108868	0.759113
1553944_at	0.0574795	0.32646		0.121919	0.122257		0.0260789	0.131362
1553945_at	0.0276241	0.754907		0.0709562	0.0595448		0.0361763	0.260102
1553946_at	0.463787	0.140981		0.29113	0.0659889		0.0190742	0.946914
1553947_at	0.119396	0.0865952		0.0960969	0.220322		0.0203308	0.582854
1553949_at	0.0243747	0.443189		0.300438	0.28273		0.0337428	0.327381
1553952_at	0.161767	0.740909		0.04955	0.00975474		0.0152872	0.256731
1553954_at	0.989968	0.00290308		0.0350683	0.295736		0.754654	0.000617148
1553955_at	0.0795787	0.896107		0.0727631	0.11914		0.108296	0.523445
1553956_at	0.100864	0.0738999		0.0430956	0.049911		0.0495652	0.00762516
1553957_at	0.0168804	0.834984		0.178719	0.207636		0.00829572	0.304067
1553959_a_at	0.955228	0.00794674		0.0577048	0.0768211		0.0178729	0.00406973
1553960_at	0.0276286	0.322063		0.099565	0.0274813		0.0176047	0.286212
1553961_s_at	0.0167942	0.977826		0.0480073	0.00363336		0.0305146	0.0221337
1553962_s_at	0.999998	0.000323477		0.0328317	0.00842474		0.0905533	0.0938031
1553963_at	0.0265011	0.566015		0.033682	0.0180494		0.140261	0.02734
1553965_x_at	0.383804	0.0231847		0.148785	0.00512558		0.0350114	0.168399
1553967_at	0.741218	0.45672		0.103427	0.0129757		0.162905	0.21283
1553968_a_at	0.0349181	0.157394		0.0807303	0.0290793		0.00974314	0.585335
1553970_s_at	0.018556	0.44106		0.0610069	0.0601897		0.0430434	0.00205516
1553971_a_at	0.04701	0.433526		0.082619	0.00224393		0.602321	3.9264e-05
1553972_a_at	0.11361	0.0311041		0.305379	0.00808875		0.0186742	0.0167929
1553973_a_at	0.0243693	0.0855394		0.145554	0.0407388		0.0303173	0.0458185
1553974_at	0.570781	0.0162896		0.0830751	0.743712		0.646706	0.0190881
1553976_a_at	0.996983	0.00393302		0.782105	0.00378646		0.70403	8.04192e-05
1553977_a_at	0.0135624	0.432466		0.883078	0.00432939		0.91556	0.000121158
1553978_at	0.999998	0.0037541		0.0943994	0.427495		0.38585	0.000512102
1553979_at	0.0643836	0.592491		0.430598	0.00194852		0.0200107	0.0561655
1553982_a_at	0.979988	0.000778347		0.120581	0.0371108		0.999979	9.33886e-07
1553983_at	0.725877	0.111656		0.0409616	0.330335		0.204418	0.036597
1553984_s_at	0.999964	0.0134575		0.111776	0.557599		0.543759	0.0504733
1553986_at	0.110391	0.127726		0.0634433	0.410078		0.0098706	0.399875
1553987_at	1	0.00337867		0.0730953	0.605763		0.915713	5.37747e-07
1553989_a_at	0.0141807	0.942441		0.0576714	0.0382096		0.109787	0.211688
1553990_at	0.0145077	0.813861		0.99768	0.000494002		0.648882	0.00185143
1553991_s_at	0.779058	0.058721		0.138887	0.236166		0.0467331	0.210736
1553992_s_at	0.259653	0.264484		0.0403958	0.500915		0.0755612	0.0111797
1553993_s_at	0.09084	0.0966362		0.0627932	0.000727183		0.011987	0.0987586
1553994_at	0.0237617	0.661039		0.0829352	0.0180648		0.22379	0.0212897
1553995_a_at	0.0464986	0.0214346		0.0571904	0.327628		0.0373809	0.666078
1553997_a_at	0.0216252	0.532821		0.0448695	0.00796603		0.0355597	0.156942
1553998_at	0.0534589	0.145834		0.0780231	0.887103		0.0374482	0.370538
1554001_at	1	5.0035e-05		0.0695871	0.0301207		0.999999	1.3536e-05
1554003_at	1	0.000185562		0.894432	0.00162826		0.0816742	0.288342
1554004_a_at	0.912244	0.00458714		0.460685	0.0253622		1	1.64595e-07
1554006_a_at	0.99604	0.00136184		0.23837	0.00198989		0.786836	0.000359362
1554007_at	0.0484897	0.187313		0.0468434	0.210957		0.386216	0.687852
1554008_at	1	0.000351808		0.0734192	0.206056		0.999999	1.62175e-07
1554010_at	0.311333	0.0983298		0.0962966	0.00576126		0.0586619	0.966825
1554012_at	0.0174621	0.894252		0.0820877	0.021787		0.00931709	0.294079
1554014_at	0.359448	0.048219		0.771881	0.0100805		1	1.50732e-05
1554015_a_at	0.182497	0.00289079		0.0631526	0.106895		0.983341	5.16588e-05
1554016_a_at	0.0733616	0.972067		0.0567496	0.0548496		0.028904	0.000163962
1554017_at	0.184182	0.122054		0.941263	0.00387192		0.0102474	0.853481
1554018_at	0.652015	8.2466e-05		0.0901639	0.208854		0.477956	0.0013336
1554019_s_at	0.0331863	0.646245		0.102026	0.116253		0.0372952	0.066202
1554020_at	0.0604367	0.933987		0.541937	0.0162009		0.0915165	0.104922
1554021_a_at	0.0433394	0.433092		0.194511	0.00853979		0.648213	0.907503
1554022_at	0.0138438	0.357402		0.0374199	0.0973093		0.0173713	0.910485
1554023_s_at	0.0340397	0.705905		0.13156	0.00317687		0.0895764	0.241295
1554026_a_at	0.110813	0.00683043		0.0420485	0.0428806		0.085537	0.00133159
1554027_a_at	0.0171713	0.0145524		0.0725856	0.515086		0.0768176	0.0192253
1554029_a_at	0.0567489	0.912592		0.109266	0.0456584		0.0605905	0.174299
1554030_at	0.0180855	0.525863		0.893336	0.0590354		0.0120459	0.838601
1554032_at	0.0277704	0.254645		0.0674581	0.389722		0.0123987	0.728749
1554033_at	0.0239401	0.557448		0.0486801	0.0800178		0.0142975	0.419117
1554034_a_at	0.019048	0.479855		0.125948	0.0684417		0.0235513	0.970231
1554036_at	0.0627231	0.104264		0.051647	0.314106		0.0127002	0.650891
1554037_a_at	0.0192826	0.563735		0.0564357	0.289037		0.0439588	0.160284
1554038_at	0.0149995	0.926202		0.865524	0.016633		0.0678412	0.228335
1554039_at	0.0170503	0.350013		0.188394	0.864528		0.022137	0.282616
1554041_at	0.0128396	0.117488		0.0297511	0.00889959		0.0279544	0.0632465
1554042_s_at	0.0368665	0.881769		0.443068	0.0248999		0.0147871	0.843154
1554043_a_at	0.0233547	0.0158127		0.115481	0.533739		0.0383819	0.110081
1554044_a_at	0.0327067	0.124068		0.036327	0.441775		0.0129691	0.608286
1554045_at	0.99998	0.0108525		0.0286675	0.101308		0.0100238	0.308012
1554047_at	0.0158656	0.878362		0.0233668	0.581514		0.522692	0.0022029
1554049_s_at	0.983393	0.00122064		0.0803684	0.0315561		0.28012	0.00277225
1554050_at	0.40051	0.253255		0.147707	0.0148039		0.108769	0.13285
1554052_at	0.112825	0.00557427		0.183289	0.0154781		0.155127	0.199665
1554053_at	0.024446	0.885678		0.128979	0.680322		0.104909	0.15032
1554057_at	0.0215512	0.313638		0.0294013	0.51442		0.149122	0.083266
1554059_at	0.0274868	0.329557		0.171482	0.011046		0.0198628	0.428003
1554060_s_at	0.0272319	0.861892		0.186025	0.125659		0.32418	0.0100818
1554062_at	0.0335983	0.559949		0.194206	0.0645603		0.986529	2.273e-05
1554063_at	0.0263823	0.664148		0.0978952	0.383162		0.0145801	0.0731249
1554065_at	0.0413151	0.375347		0.11451	0.0292363		0.166194	0.0139335
1554067_at	1	0.000790259		0.0547943	0.0672988		0.315791	0.0438091
1554068_s_at	0.223319	0.00168624		0.0917212	0.470851		0.235427	0.0112757
1554069_at	0.0431868	0.508338		0.0585017	0.267606		0.0293863	0.58947
1554071_at	0.0155381	0.835187		0.0408071	0.621293		0.0263372	0.479915
1554072_s_at	0.0104311	0.622326		0.55333	0.1175		0.00808633	0.391867
1554074_s_at	0.0152996	0.78052		0.137749	0.0334801		0.0532106	0.255727
1554076_s_at	0.0123519	0.376641		0.377715	0.0255962		0.0235606	0.1329
1554077_a_at	0.0571212	0.777172		0.0574167	0.0288394		0.395949	0.227784
1554078_s_at	0.820959	0.0120049		0.805945	0.0416345		0.583407	0.0269883
1554079_at	0.0851836	0.51904		0.162005	0.00338088		0.0192664	0.675418
1554080_at	0.0995798	0.0214568		0.0660267	0.0454716		0.328754	0.000482966
1554082_a_at	1	5.29091e-05		0.953524	0.00106374		0.617599	0.000523721
1554084_a_at	0.930695	0.0015617		0.0427419	0.525059		0.234076	0.0421926
1554085_at	0.0916349	0.292463		0.106957	0.340743		0.172021	0.499117
1554086_at	0.843144	0.0227275		0.0514353	0.0235426		0.0228406	0.546685
1554089_s_at	0.0999967	0.691628		0.360453	0.00253445		0.0448983	0.971777
1554091_a_at	0.0120324	0.774006		0.0168881	0.0152988		0.118847	0.0160342
1554093_a_at	0.857864	0.0241592		0.125052	0.0452028		0.20243	8.57803e-05
1554094_at	0.0340075	0.271517		0.708628	0.0202131		0.0740363	0.334768
1554095_at	0.0195501	0.160455		0.0521416	0.122804		0.0273905	0.515638
1554096_a_at	0.139134	0.184598		0.100764	0.326246		0.0127667	0.288819
1554097_a_at	0.0611255	0.315827		0.990279	0.000261417		0.510429	0.000333087
1554098_at	0.487428	0.0542668		0.0190204	0.829609		0.0156704	0.0803036
1554099_a_at	0.362847	0.0238098		0.0920694	0.887155		0.0176091	0.297454
1554101_a_at	0.0107188	0.201692		0.0348299	0.000477089		0.0443068	0.108814
1554102_a_at	0.0145079	0.638066		0.0350432	0.25768		0.0375492	0.114249
1554103_at	0.0162216	0.979515		0.0485114	0.117615		0.0628623	0.0830814
1554105_at	0.792119	0.0245446		0.0361003	0.00977868		0.527178	0.000498189
1554106_at	0.766225	0.0422628		0.345768	0.0355044		0.017365	0.279926
1554108_at	0.0132513	0.813544		0.0485361	0.370341		0.054433	0.765412
1554110_at	0.068692	0.0912952		0.0611041	0.0511755		0.0230161	0.556816
1554112_a_at	0.605831	0.00703876		0.115111	0.811416		0.946952	0.000181307
1554113_a_at	0.0327834	0.497378		0.0641768	0.490224		0.0165249	0.631896
1554114_s_at	0.0198046	0.783361		0.117844	0.118585		0.0343506	0.0258237
1554115_at	0.026798	0.239371		0.214831	0.258247		0.0444679	0.145138
1554116_s_at	0.048049	0.356863		0.0404548	0.266644		0.0163543	0.820118
1554117_at	0.184395	0.190306		0.287614	0.117318		0.0143401	0.6537
1554119_at	0.352472	0.019067		0.0449331	0.549797		0.0660595	0.114551
1554121_at	0.0150509	0.340974		0.0248782	0.359921		0.0159515	0.949725
1554122_a_at	0.028022	0.900463		0.0612367	0.916381		0.089536	0.0126548
1554125_a_at	0.0165955	0.598836		0.0616092	0.28375		0.0224494	0.214227
1554126_at	0.137253	0.1497		0.0358286	0.774421		0.84309	1.17016e-06
1554127_s_at	0.14298	0.0806886		0.281377	0.0157998		1	1.43894e-07
1554128_at	0.0226341	0.473352		0.580937	0.0276383		0.0315743	0.593013
1554129_a_at	0.12504	0.543014		0.297434	0.025591		0.0170422	0.629885
1554131_at	0.0191163	0.739622		0.0365004	0.299658		0.00872897	0.246512
1554132_a_at	0.0314914	0.784759		0.161115	0.000309516		0.0483867	0.85274
1554133_at	0.0131037	0.363415		0.0539358	0.848312		0.0106647	0.974294
1554140_at	0.027941	0.0933978		0.195424	0.0400025		0.798846	0.00216746
1554141_s_at	0.108149	0.0471256		0.0535157	0.917323		0.0181081	0.756202
1554142_at	0.0267503	0.651969		0.0180817	0.59717		0.00859884	0.898338
1554143_a_at	0.0159531	0.826088		0.0571283	0.83027		0.0132561	0.759555
1554145_a_at	0.0184885	0.633572		0.0527946	0.145901		0.00855556	0.883071
1554147_s_at	0.0348131	0.451859		0.184159	0.0259893		0.0255994	0.172908
1554148_a_at	0.0082268	0.196886		0.125801	0.0410889		0.030947	0.403522
1554149_at	0.351842	0.0828434		0.123751	0.0587972		0.0618053	0.000343638
1554151_at	0.0321255	0.883083		0.361589	0.0194164		0.170183	0.0148165
1554152_a_at	0.49723	0.0215398		0.0869212	0.0338779		0.131476	0.940328
1554153_a_at	0.106285	0.262555		0.050044	0.769501		0.0363346	0.321901
1554154_at	0.0101264	0.857697		0.0408466	0.386923		0.289404	0.321207
1554155_at	0.0357303	0.0843783		0.059555	0.00339493		0.774923	0.000193672
1554156_a_at	0.0158315	0.689946		0.957452	0.0457097		0.0131819	0.873609
1554157_a_at	0.0649681	0.3856		0.484093	0.015751		0.110556	0.0516061
1554158_at	0.0160804	0.0835385		0.0637591	0.217066		0.362222	0.0150133
1554159_a_at	0.0480394	0.598166		0.0456514	0.797938		0.0149313	0.143189
1554160_a_at	0.0226571	0.58746		0.030773	0.0434414		0.00957787	0.454005
1554161_at	0.524774	0.0914896		0.077353	0.452882		0.684208	0.126109
1554163_at	0.181591	0.163657		0.0364988	0.204406		0.0098682	0.10107
1554165_at	0.023905	0.516512		0.111226	0.84643		0.0190777	0.779939
1554167_a_at	0.0457617	0.117212		0.14938	0.000800838		0.14909	0.00681132
1554168_a_at	0.999999	0.000355065		0.0658926	0.019663		1	0.000290547
1554170_a_at	0.0171087	0.654268		0.0530993	0.0391594		0.0070391	0.526019
1554171_at	0.0459911	0.54721		0.130672	0.156625		0.0316827	0.96558
1554172_a_at	0.0267824	0.709193		0.189682	0.0629263		0.04549	0.187797
1554173_at	0.028848	0.776141		0.173487	0.00816715		0.0140472	0.13516
1554175_at	0.0334329	0.424851		0.134301	0.0489344		0.0232996	0.48688
1554176_a_at	0.474376	0.120818		0.0793028	0.0737366		0.0690769	0.00991703
1554177_a_at	0.0159532	0.813157		0.535573	0.0984273		0.345037	0.0368624
1554178_a_at	0.209556	0.321198		0.0825882	0.0596337		0.656236	0.802915
1554179_s_at	0.0881267	0.287046		0.167077	0.0163945		0.00853972	0.524572
1554181_at	0.0226838	0.72429		0.0461688	0.00395332		0.0455878	0.0642332
1554182_at	0.0529691	0.0312348		0.0577339	0.0422202		0.0113928	0.186219
1554183_s_at	0.0208234	0.823327		0.0674987	0.0529806		0.0205397	0.356898
1554185_at	0.0259979	0.380691		0.0377005	0.103337		0.0114505	0.522213
1554187_at	0.0248343	0.904246		0.0610874	0.416965		0.0398146	0.233432
1554188_at	0.105394	0.4783		0.284382	0.0587315		0.0184996	0.448263
1554190_s_at	0.0137973	0.96186		0.035939	0.90003		0.0109482	0.962279
1554192_s_at	0.044271	0.707933		0.125349	0.029651		0.0110197	0.751266
1554193_s_at	0.0422238	0.215635		0.0259629	0.219579		0.022125	0.0601806
1554194_at	0.0552748	0.591595		0.868362	0.0034068		0.0300465	0.0121032
1554195_a_at	0.560983	0.0525364		0.57741	0.000313476		0.999998	5.7288e-07
1554196_at	0.011486	0.45073		0.0337327	0.450094		0.0307823	0.825186
1554198_at	0.0807018	0.790489		0.157532	0.038402		0.0146099	0.742933
1554199_at	0.0295495	0.332768		0.841694	0.00372951		0.00862459	0.52824
1554201_at	0.0102787	0.515482		0.0885353	0.604127		0.0365414	0.187647
1554202_x_at	0.0332489	0.440213		0.172924	0.211195		0.0253864	0.652204
1554203_at	0.00785287	0.592371		0.106126	0.46128		0.0175625	0.419408
1554205_s_at	0.0259363	0.234657		0.0171598	0.764665		0.031458	0.329267
1554206_at	0.0142732	0.953855		0.0608937	0.678326		0.02088	0.23944
1554208_at	0.0541795	0.169149		0.18471	0.0583425		0.0283653	0.210919
1554210_at	0.0447609	0.825883		0.147693	0.0387739		0.0108637	0.729805
1554212_s_at	0.110961	0.301818		0.110728	0.0642048		0.0146212	0.95834
1554213_at	0.00760889	0.724454		0.0424138	0.0344451		0.0428928	0.622402
1554214_at	0.0300712	0.188888		0.243339	0.423195		0.0130739	0.181833
1554216_at	0.0130922	0.496505		0.054196	0.0227651		0.0342615	0.0286472
1554217_a_at	0.0281588	0.269525		0.0631127	0.0885748		0.285601	0.0117924
1554219_at	0.0450883	0.415765		0.232442	0.0589813		0.542966	0.0314139
1554220_a_at	0.241625	0.242609		0.0637471	0.0347108		0.0147883	0.672813
1554222_at	0.0735899	0.385967		0.217673	0.101339		0.0410158	0.116944
1554224_at	0.0184326	0.554887		0.100822	0.183649		0.0476792	0.00607217
1554225_a_at	0.0230427	0.546728		0.0265062	0.211738		0.0119956	0.398609
1554228_a_at	0.0436526	0.833838		0.0975876	0.320037		0.0159715	0.362605
1554229_at	0.0414353	0.675232		0.0791737	0.699617		0.683733	0.0322067
1554231_a_at	0.0179374	0.759548		0.0230271	0.119131		0.118464	0.00146132
1554232_a_at	0.0662719	0.46576		0.146812	0.00836371		0.041426	0.387315
1554233_at	0.0636797	0.0836888		0.055088	0.438835		0.016466	0.313353
1554234_at	0.00628094	0.780568		0.999881	0.0045235		0.0099136	0.609175
1554235_at	0.021162	0.681654		0.0618064	0.570182		0.0177412	0.557933
1554237_at	0.0128062	0.212159		0.474332	0.0937435		0.0257152	0.208817
1554239_s_at	0.553191	0.0493193		0.0476297	0.21648		0.12409	0.00260401
1554240_a_at	0.0274975	0.390499		0.0311721	0.332857		0.034627	0.0968759
1554241_at	0.0460584	0.674196		0.458086	0.00105806		0.358426	0.267169
1554242_a_at	0.0276252	0.470875		0.44867	0.0201489		0.00845296	0.0696694
1554245_x_at	0.772791	0.00833749		0.0471008	0.0522613		0.102819	0.18219
1554246_at	0.0289142	0.481048		0.0621816	0.102468		0.0344784	0.0376928
1554248_at	0.572352	0.0173331		0.381786	0.0704529		0.00950106	0.48697
1554249_a_at	0.0808219	0.179405		0.0805561	0.00415264		0.0158954	0.066843
1554250_s_at	0.0256431	0.197181		0.0410615	0.439185		0.188485	0.325409
1554251_at	0.808393	0.0509845		0.165052	0.0808943		0.804316	6.7068e-05
1554252_a_at	0.0715229	0.0327482		0.208033	0.0134043		0.317086	0.000416044
1554253_a_at	0.0263163	0.972247		0.558942	0.00705494		0.117563	0.0100059
1554256_a_at	0.234984	0.0433444		0.113241	0.617425		0.0391964	0.0843751
1554258_a_at	0.020507	0.409477		0.145513	0.00104427		0.0233524	0.583025
1554259_at	0.683886	0.140466		0.0818396	0.0966437		0.0133625	0.438327
1554260_a_at	0.0883908	0.714071		0.255086	0.0318403		0.904319	0.396886
1554261_at	0.0994863	0.0972713		0.796082	0.664804		0.0194966	0.975475
1554262_s_at	0.081671	0.269341		0.315067	0.210352		0.0105125	0.52145
1554264_at	0.0127234	0.941561		0.0364814	0.92867		0.0265911	0.035738
1554266_at	0.0140169	0.548168		0.0515482	0.632467		0.0151413	0.807893
1554268_at	0.0516334	0.0792693		0.494448	0.0210026		0.0315978	0.208374
1554271_a_at	0.398111	0.000254528		0.0492427	0.00543323		0.0160991	0.86965
1554272_at	0.011709	0.311158		0.0482566	0.743586		0.0115642	0.295076
1554273_a_at	0.165326	0.314292		0.0938763	0.143143		0.0193713	0.384244
1554274_a_at	0.229203	0.636455		0.153143	0.0372402		0.0200212	0.130693
1554276_at	0.0618559	0.237041		0.317418	0.0547448		0.0140336	0.315629
1554277_s_at	0.208384	0.36544		0.039559	0.823706		0.0180375	0.0456773
1554279_a_at	0.914615	0.044509		0.034298	0.243562		0.00932367	0.953309
1554280_a_at	0.0111865	0.605614		0.0460908	0.797326		0.0110689	0.382236
1554281_at	0.0168367	0.0333991		0.0321297	0.525179		0.010128	0.603958
1554283_at	0.0763934	0.759897		0.0751458	0.0223485		0.0741896	0.307579
1554285_at	0.0108159	0.434402		0.87559	0.00375853		0.0253214	0.412775
1554286_at	0.0183683	0.65913		0.0752792	0.108658		0.0208833	0.404442
1554287_at	0.0760669	0.119896		0.602793	0.00688388		0.0156631	0.921841
1554288_at	0.0197603	0.059271		0.0213808	0.109301		0.0133729	0.354314
1554290_at	0.930548	0.00578673		0.165737	0.195931		0.170154	0.0709808
1554291_at	0.0355614	0.222663		0.0665989	0.263696		0.216113	0.00359178
1554292_a_at	0.0341002	0.716511		0.0633428	0.0478541		0.0662884	0.432111
1554293_at	0.985059	0.0159801		0.131303	0.234476		0.0505362	0.187506
1554294_s_at	0.846251	0.0172935		0.235659	0.212774		0.0129829	0.502581
1554295_x_at	0.193645	0.00231189		0.0581173	0.00288984		0.348702	0.0206094
1554296_at	0.0223559	0.795213		0.55845	0.126505		0.0319767	0.375186
1554298_a_at	0.0159677	0.508024		0.0364634	0.980114		0.00867042	0.570627
1554299_at	0.0300589	0.36268		0.0989491	0.133395		0.0283111	0.367808
1554300_a_at	0.0278271	0.400717		0.343915	0.11128		0.012864	0.839548
1554301_at	0.0230355	0.329633		0.137879	0.619165		0.0155346	0.664281
1554302_s_at	0.0323817	0.583698		0.0794673	0.0698245		0.0888842	0.40808
1554303_at	0.352651	0.122151		0.0569816	0.376598		0.057764	0.285734
1554305_at	0.0213706	0.105772		0.0975859	0.592008		0.0124886	0.943135
1554306_at	0.0643558	0.117172		0.542717	0.948112		0.0222168	0.718135
1554307_at	0.0387347	0.707527		0.22123	0.0243168		0.0153949	0.535114
1554308_s_at	0.08485	0.00870523		0.0397664	0.32324		0.0265836	0.132467
1554309_at	0.0411783	0.167272		0.0289057	0.474563		0.0164859	0.510524
1554310_a_at	0.0227483	0.946192		0.234094	0.0223632		0.172877	0.0429719
1554311_a_at	0.278812	0.0452771		0.118178	0.780402		0.0742622	0.00936799
1554312_at	0.163893	0.135612		0.67619	0.0112847		0.0260056	0.278474
1554314_at	0.069409	0.0120836		0.0568946	0.00251972		0.114952	0.012257
1554316_at	0.0125283	0.855217		0.0225626	0.707643		0.0384842	0.379157
1554317_s_at	0.968431	0.0167628		0.622779	0.137182		0.0337126	0.376945
1554318_at	0.0391754	0.236113		0.314602	0.193044		0.00865183	0.697566
1554319_at	0.0846934	0.336149		0.0455061	0.473859		0.0321706	0.0883479
1554321_a_at	0.0153009	0.402721		0.031306	0.0791485		0.253494	0.470661
1554322_a_at	0.0237437	0.695563		0.037437	0.0337018		0.0356508	0.242207
1554324_s_at	0.016605	0.736267		0.0402241	0.928682		0.0229501	0.672938
1554325_at	0.0152899	0.955434		0.0696041	0.086298		0.0158881	0.382972
1554327_a_at	0.0540541	0.662594		0.154661	0.0872078		0.0463541	0.888135
1554328_at	0.00838154	0.854409		0.0224775	0.626458		0.0223905	0.0970055
1554329_x_at	0.0084433	0.125077		0.024988	0.140597		0.0206205	0.303863
1554331_a_at	0.022414	0.801852		0.132967	0.121819		0.0099871	0.83424
1554332_a_at	0.0320523	0.343651		0.414564	0.088897		0.06652	0.058363
1554333_at	0.0152026	0.358013		0.0360119	0.0240969		0.33277	0.0253324
1554334_a_at	0.0393657	0.719343		0.275063	0.0156596		0.164323	0.014185
1554335_at	0.0287623	0.516911		0.356195	0.0282024		0.0109563	0.493693
1554337_at	0.0536	0.44342		0.036108	0.232429		0.0853916	0.0276897
1554339_a_at	0.0402249	0.637259		0.0875828	0.0125813		0.0209572	0.793557
1554340_a_at	0.0488169	0.154145		0.0963166	0.274603		0.123682	0.233328
1554341_a_at	0.0162067	0.650247		0.243328	0.544168		0.0300929	0.139516
1554342_s_at	0.00760474	0.498264		0.0224768	0.164167		0.328257	0.00405985
1554343_a_at	0.0168515	0.451981		0.473807	0.083538		0.0269075	0.731362
1554344_s_at	0.0211303	0.567995		0.51527	0.00119312		0.0215913	0.674701
1554345_a_at	0.0387241	0.331151		0.11501	0.0498328		0.222172	0.00691963
1554346_at	0.071113	0.721162		0.096743	0.0421251		0.0683056	0.0620571
1554348_s_at	0.0287844	0.290839		0.0524298	0.113798		0.0140469	0.571561
1554349_at	0.0150581	0.709743		0.784596	0.0667457		0.251719	0.0051231
1554351_a_at	0.0401819	0.808903		0.101613	0.0150343		0.876184	1.84679e-05
1554352_s_at	0.0504425	0.942359		0.247117	0.0237524		0.0116021	0.237263
1554354_at	0.00863716	0.263742		0.0303703	0.150177		0.00975161	0.520665
1554355_a_at	0.0109192	0.619565		0.980209	0.0398063		0.0100778	0.199174
1554356_at	0.13337	0.0825246		0.191073	0.127083		0.0170709	0.161449
1554360_at	0.0236568	0.807706		0.695155	0.083842		0.0387427	0.133481
1554362_at	0.0517225	0.0642758		0.0771069	0.200639		0.0148331	0.453857
1554364_at	0.0994257	0.00447312		0.073396	0.0405307		0.128473	0.0973598
1554365_a_at	0.266791	0.0811424		0.135973	0.0315585		0.00994668	0.248856
1554367_at	0.0167967	0.451374		0.117415	0.0531316		0.0906788	0.0817052
1554368_at	0.0194111	0.956591		0.0436609	0.159148		0.0166558	0.74547
1554371_at	0.0189181	0.758937		0.554891	0.057366		0.0667918	0.00796135
1554372_at	0.0425568	0.979876		0.103943	0.134633		0.0224722	0.360862
1554374_at	0.04477	0.497069		0.801652	0.000437679		0.0110701	0.785421
1554375_a_at	0.00913437	0.859169		0.921529	0.00699314		0.0197335	0.854761
1554376_s_at	0.0100049	0.271293		0.0581676	0.239798		0.0172078	0.325307
1554377_a_at	0.113718	0.179755		0.0649185	0.356247		0.0117122	0.632315
1554378_a_at	0.152501	0.392718		0.0644116	0.84129		0.94373	0.00204306
1554379_a_at	0.356215	0.434252		0.101952	0.0506334		0.0612915	0.962351
1554380_at	0.0156095	0.921643		0.695872	0.0148064		0.118353	0.014908
1554382_at	0.12076	0.135987		0.304547	0.0701791		0.0252981	0.289888
1554383_a_at	0.912965	0.00247848		0.99809	7.09382e-05		0.0954588	0.118323
1554384_at	0.0420117	0.579161		0.122251	0.000128122		0.0144097	0.854508
1554385_a_at	0.0437632	0.262519		0.137476	0.00985656		0.0141081	0.866086
1554386_at	0.0281847	0.702057		0.0526485	0.0157787		0.0187268	0.352732
1554388_at	0.018655	0.594007		0.0332774	0.0239599		0.0914	0.0722331
1554390_s_at	0.0257593	0.347161		0.829544	0.0100585		0.854826	0.00034704
1554391_at	0.0514614	0.726065		0.531245	0.0246949		0.0111133	0.933255
1554393_a_at	0.182033	0.0729076		0.0884975	0.0182867		0.983976	3.20078e-10
1554394_at	0.325773	0.598409		0.185951	0.0107715		0.0217393	0.955226
1554396_at	0.199183	0.0544897		0.379422	0.042626		0.0229923	0.374864
1554397_s_at	0.0259159	0.318179		0.119945	0.00803475		0.0494541	0.0133296
1554398_at	0.0286814	0.785624		0.274493	0.00660546		0.0566316	0.0746762
1554400_at	0.0155973	0.496392		0.0873931	0.720586		0.0190827	0.0335223
1554401_a_at	0.017041	0.423563		0.0182755	0.0701824		0.0144333	0.974546
1554403_a_at	0.0977059	0.195198		0.532589	0.0134601		0.0515641	0.174031
1554404_a_at	0.0193082	0.259137		0.197467	0.121885		0.637223	0.00335604
1554405_a_at	0.00595263	0.512256		0.977541	0.0133273		0.0144006	0.344855
1554406_a_at	0.0121152	0.58402		0.0362064	0.223145		0.0333528	0.669776
1554408_a_at	0.999999	0.000124286		0.193214	0.0162656		0.0190017	0.328709
1554409_at	0.134538	0.00883509		0.127692	0.0586619		0.011387	0.809571
1554410_a_at	0.0231247	0.560974		0.0822207	0.0732618		0.0157139	0.0790702
1554411_at	0.977081	0.00291085		0.24809	0.0170764		0.397465	8.02582e-06
1554413_s_at	0.0327194	0.540799		0.0483368	0.597026		0.0919471	0.0827654
1554414_a_at	0.0234901	0.559136		0.0687134	0.00298039		0.035675	0.144942
1554415_at	0.167251	0.12531		0.474207	0.0075126		0.793195	0.000340278
1554417_s_at	0.42894	0.0955044		0.39544	0.11012		0.00724525	0.667618
1554418_s_at	0.0226297	0.440322		0.154869	0.0627837		0.107755	0.0192529
1554419_x_at	0.0164116	0.512833		0.0871626	0.109137		0.00854896	0.74951
1554420_at	0.159507	0.0662432		0.103158	0.0402808		0.0705342	0.047401
1554423_a_at	0.214731	0.182002		0.169357	0.641514		0.213808	0.983987
1554424_at	0.897315	0.0055653		0.169716	0.385243		0.202989	0.0437538
1554428_s_at	0.0285506	0.647197		0.0941809	0.170491		0.381859	0.0127075
1554429_a_at	0.0401295	0.295098		0.0794745	0.0289016		0.0148522	0.137652
1554430_at	0.00730086	0.605882		0.0226754	0.808751		0.0137982	0.261317
1554432_x_at	0.00994311	0.644315		0.0278042	0.489155		0.00741313	0.21082
1554433_a_at	0.0353739	0.455042		0.524474	0.0156337		0.112608	0.0215944
1554436_a_at	0.120696	0.722768		0.232272	0.0155511		0.0100914	0.229995
1554438_at	0.997698	0.00342376		0.313888	0.38367		0.0528286	0.983664
1554440_at	0.643943	0.0310626		0.186693	0.968987		0.0154203	0.37324
1554441_a_at	0.088516	0.386319		0.208962	0.00296756		0.0203063	0.93605
1554442_at	0.012894	0.740067		0.148632	0.123835		0.00956752	0.853269
1554443_s_at	0.0290429	0.816543		0.216433	0.0792846		0.0346771	0.22436
1554444_s_at	0.0223885	0.263		0.0266455	0.0176101		0.0701505	0.566618
1554445_at	0.0421419	0.396333		0.0289035	0.713929		0.0137139	0.901038
1554447_at	0.0374635	0.612396		0.286016	0.00463767		0.0458567	0.207971
1554448_at	0.0294399	0.546926		0.337675	0.0115257		0.0161952	0.576971
1554449_at	0.0383908	0.745499		0.120061	0.289753		0.0191258	0.00373169
1554450_s_at	0.0607632	0.581801		0.107832	0.048846		0.0211981	0.168792
1554451_s_at	0.392665	0.043198		0.196846	0.0259053		0.150236	0.550831
1554452_a_at	0.289588	0.37025		0.997245	7.25477e-05		0.288651	0.295484
1554453_at	0.869374	0.00103268		0.0802206	0.142663		0.0320103	0.722522
1554455_at	0.036769	0.676505		0.0833586	0.204156		0.0833099	0.0135607
1554456_a_at	0.0164242	0.771166		0.664269	0.196331		0.0096017	0.230938
1554459_s_at	0.0397685	0.904719		0.0615453	0.0276069		0.0975931	0.495492
1554460_at	0.0167348	0.214727		0.0230048	0.168141		0.02352	0.147951
1554462_a_at	0.812647	0.0419255		0.0722201	0.0780028		0.0355847	0.761208
1554464_a_at	1	0.00369376		0.0302469	0.0598968		0.632061	0.00203175
1554465_s_at	0.0165355	0.992251		0.450624	0.000668937		0.947185	3.50473e-06
1554466_a_at	0.103416	0.839105		0.177186	0.0177229		0.00678882	0.096272
1554468_s_at	0.0365498	0.561541		0.125522	0.205713		0.0485195	0.759878
1554469_at	0.0633299	0.351387		0.244675	0.0354923		0.0203303	0.532831
1554470_s_at	0.0355414	0.915551		0.0704974	0.238928		0.0581637	0.0608358
1554471_a_at	0.591237	0.0573309		0.0581801	0.0135169		0.0518133	0.00638332
1554472_a_at	0.0176313	0.304807		0.036265	0.395238		0.320124	0.000777
1554473_at	0.0289825	0.412594		0.0824919	0.277097		0.0531424	0.816075
1554474_a_at	0.0119876	0.254097		0.833144	0.000394806		0.668372	0.00681045
1554475_a_at	0.351826	0.0545395		0.0465564	0.258354		0.0125957	0.485257
1554476_x_at	0.254114	0.113662		0.0642042	0.719125		0.0193489	0.557948
1554478_a_at	0.116995	0.156211		0.0622838	0.247749		0.484562	0.00384128
1554479_a_at	0.572745	0.201862		0.118285	0.179684		0.211805	0.72005
1554480_a_at	0.0900927	0.517197		0.0401915	0.0574648		0.0922587	0.0592737
1554481_a_at	0.269067	0.133919		0.0626332	0.78082		0.157707	0.0607272
1554482_a_at	0.0600503	0.154939		0.05843	0.0262614		0.0621073	0.000153019
1554483_at	0.08704	0.205262		0.613321	0.0104847		0.0185056	0.448926
1554485_s_at	0.0349008	0.940772		0.15294	0.23554		0.556903	0.0219338
1554486_a_at	0.967764	0.00121059		0.313225	0.0254317		0.618509	0.00136198
1554487_a_at	0.0120872	0.121472		0.677246	0.000597815		0.0169852	0.859038
1554488_at	0.0139373	0.875111		0.0422212	0.299131		0.0434092	0.0124203
1554489_a_at	0.0172683	0.556027		0.0820149	0.10354		0.0102057	0.11109
1554491_a_at	0.0123597	0.284581		0.435202	0.0678984		0.0135876	0.984202
1554492_at	0.00974157	0.393838		0.0738659	0.614018		0.0173004	0.21711
1554493_s_at	0.114176	0.974215		0.0522929	0.0167232		0.0872726	0.0232965
1554494_at	0.0249679	0.335538		0.0765575	0.201323		0.0349223	0.480339
1554495_s_at	0.0308107	0.224181		0.0621468	0.757125		0.0315536	0.161609
1554496_at	0.0123195	0.894905		0.14339	0.0601117		0.0204382	0.649247
1554499_s_at	0.711177	0.0243824		0.039732	0.16938		0.0841106	0.229966
1554500_a_at	0.0605239	0.208567		0.280374	0.520661		0.0202482	0.0787897
1554501_at	0.0983287	0.104886		0.0312193	0.255765		0.0141415	0.906713
1554503_a_at	0.0280207	0.730962		0.101242	0.0670955		0.0355814	0.0740304
1554504_at	0.0107546	0.864167		0.0725757	0.321493		0.0758519	0.0615686
1554506_x_at	0.0217908	0.38541		0.0709661	0.149979		0.0209932	0.23212
1554507_at	0.0109684	0.311886		0.0231221	0.405831		0.00725535	0.314802
1554508_at	0.0450194	0.21807		0.285211	0.394886		0.0132999	0.734087
1554509_a_at	0.0203144	0.772751		0.279512	0.00582382		0.108186	0.0798767
1554510_s_at	0.051001	0.383652		0.427823	0.00435514		0.191177	0.268264
1554511_at	0.0281016	0.999941		0.110251	0.114975		0.0171216	0.489835
1554512_a_at	0.0432322	0.0921632		0.0717218	0.596353		0.0430747	0.553881
1554513_s_at	0.220556	0.0453267		0.107352	0.263903		0.0192989	0.749643
1554514_at	0.326575	0.0512155		0.455206	0.0201946		0.0413163	0.383897
1554516_at	0.817045	0.00424935		0.139869	0.088455		0.0192834	0.138888
1554517_x_at	0.116953	0.152925		0.11779	0.138065		0.0227774	0.147114
1554518_at	0.00900483	0.337819		0.02066	0.258413		0.320826	0.0328747
1554519_at	0.0255935	0.781213		0.478439	0.00918659		0.0721137	0.0516835
1554520_at	0.0357274	0.25442		0.37756	0.0610099		0.0272561	0.705955
1554522_at	0.0188685	0.358681		0.0544717	0.889734		0.193431	0.0218898
1554523_a_at	0.229802	0.424765		0.52372	0.0402069		0.0148359	0.114361
1554524_a_at	0.0359441	0.366633		0.688101	0.0135675		0.00747463	0.513071
1554526_at	0.00969584	0.557688		0.03308	0.522806		0.114917	0.0316875
1554528_at	0.0491055	0.165917		0.123293	0.119495		0.0131886	0.589097
1554530_at	0.0471044	0.200889		0.125198	0.042877		0.0131296	0.622296
1554531_at	0.0812188	0.111915		0.175597	0.00228746		0.0096016	0.982065
1554533_at	0.0150305	0.452496		0.0600909	0.0746845		0.0268746	0.247334
1554534_at	0.0663451	0.211538		0.159747	0.0401907		0.0776704	0.105836
1554536_at	0.0186414	0.899901		0.0782484	0.734783		0.056747	0.121329
1554537_at	0.518079	0.0232331		0.0721885	0.543535		0.012132	0.38797
1554538_at	0.00931551	0.809137		0.049309	0.581609		0.0115239	0.879299
1554539_a_at	0.796868	0.254881		0.0514837	0.00400088		0.020039	0.548713
1554540_at	0.0205862	0.384253		0.0260783	0.880149		0.0403523	0.0822498
1554541_a_at	0.0273686	0.387678		0.0472009	0.0259832		0.168037	0.0213161
1554542_at	0.00948082	0.52736		0.0420464	0.185845		0.0103439	0.410104
1554543_at	0.0206406	0.786182		0.0587883	0.531401		0.0323368	0.339737
1554544_a_at	0.0188453	0.0747179		0.0668815	5.39012e-05		0.0143979	0.216921
1554545_at	0.014808	0.550899		0.120347	0.00577239		0.0144901	0.216092
1554547_at	0.618954	0.000549943		0.0656	0.199575		0.923686	1.09714e-05
1554549_a_at	0.307649	0.131237		0.0736729	0.340399		0.0521554	0.384226
1554550_at	0.02629	0.529318		0.0701247	0.769208		0.00791989	0.550623
1554553_s_at	0.380105	0.0942069		0.0880512	0.163217		0.336379	0.103883
1554554_at	0.0166677	0.348675		0.80389	0.0482331		0.0103213	0.347855
1554555_a_at	0.0179721	0.701391		0.0338187	0.687505		0.0179081	0.95484
1554556_a_at	0.062697	0.171896		0.0311148	0.80676		0.0533603	0.229287
1554557_at	0.816789	0.042421		0.0573495	0.121366		0.772125	5.27757e-05
1554558_at	0.0508357	0.66533		0.129618	0.883092		0.0816167	0.157275
1554559_at	0.00856503	0.186946		0.0197682	0.111581		0.0271003	0.241336
1554560_at	0.0252225	0.944347		0.80105	0.023415		0.0123522	0.853386
1554564_a_at	0.164994	0.125412		0.0824274	0.58136		0.0168998	0.984611
1554565_x_at	0.0108275	0.873439		0.433046	0.274873		0.0698887	0.041284
1554566_at	0.0159732	0.393887		0.0772887	0.00450504		0.010934	0.564199
1554568_at	0.0421145	0.104545		0.287831	0.395697		0.0148258	0.466001
1554569_a_at	0.0812676	0.00547407		0.9773	0.0228028		0.0198315	0.956366
1554571_at	0.0181317	0.695097		0.169906	0.100604		0.0119888	0.944307
1554572_a_at	0.0386332	0.177944		0.0708329	0.0299547		0.626251	0.00548029
1554574_a_at	0.021466	0.229561		0.482918	0.388357		0.501915	0.0151137
1554575_a_at	0.0966385	0.038463		0.129641	0.151956		0.0260372	0.866965
1554576_a_at	0.0231487	0.348204		0.823805	0.349369		0.0761453	0.0205228
1554577_a_at	0.0312747	0.0608756		0.153956	0.0546377		0.542793	1.55893e-06
1554578_at	0.00907665	0.467919		0.0212988	0.00850673		0.0161309	0.43927
1554579_a_at	0.144741	0.159323		0.106808	0.398474		0.431444	0.0426125
1554580_a_at	0.0148605	0.404755		0.801091	0.0245935		0.0496548	0.600112
1554582_a_at	0.797566	0.00386575		0.169091	0.204817		0.0244156	0.327262
1554583_a_at	0.0415452	0.449314		0.186161	0.0123725		0.0149509	0.282332
1554584_at	0.0133093	0.982706		0.473032	0.00502856		0.00954038	0.946246
1554586_a_at	0.523664	0.111852		0.06044	0.200043		0.0118651	0.218547
1554588_a_at	0.0323834	0.3862		0.11003	0.532085		0.103477	0.00810449
1554589_at	0.158692	0.113914		0.128681	0.00426936		0.0357862	0.0699599
1554591_at	0.0620101	0.52372		0.54596	0.0248855		0.134713	0.0541796
1554592_a_at	0.0686266	0.185634		0.700287	1.40982e-05		0.0477692	0.0955184
1554593_s_at	0.0567853	0.34846		0.760463	1.96084e-06		0.115705	0.558943
1554594_at	0.0264953	0.40966		0.718949	0.288781		0.0373013	0.0967472
1554595_at	0.012411	0.642826		0.0548609	0.267002		0.0530148	0.206154
1554597_at	0.0230057	0.197675		0.0335451	0.876593		0.0129514	0.555748
1554599_x_at	0.0202423	0.765781		0.0314215	0.0949998		0.0160564	0.846462
1554600_s_at	0.161166	0.29869		0.0649824	0.204102		0.434718	0.208044
1554601_at	0.0291754	0.249436		0.427177	0.340936		0.0129244	0.684965
1554602_at	0.0119089	0.529131		0.808446	0.0301773		0.0202874	0.461037
1554604_at	0.0266459	0.316189		0.472432	0.178792		0.0136733	0.468293
1554606_at	0.161878	0.059367		0.464583	0.015003		0.0199525	0.378147
1554607_at	0.0164535	0.903946		0.210897	0.130788		0.013188	0.556994
1554608_at	0.0171856	0.110378		0.0414803	0.0348244		0.506407	0.0230836
1554609_at	0.0302634	0.134238		0.237637	0.664368		0.233964	0.0229615
1554610_at	0.203012	0.522068		0.399289	0.0284446		0.154629	0.0171136
1554612_at	0.0878898	0.0268902		0.154555	0.434236		0.0568115	0.0222863
1554613_a_at	0.0125255	0.824318		0.033085	0.0193947		0.0124978	0.872484
1554614_a_at	0.0983885	0.581626		0.0972102	0.167204		0.0150737	0.350859
1554615_at	0.0129021	0.711246		0.0392705	0.635766		0.0130944	0.963149
1554616_at	0.0336899	0.48847		0.203964	0.0689382		0.0144325	0.789151
1554618_at	0.0387519	0.783376		0.201069	0.0241704		0.0212548	0.377012
1554619_at	0.019774	0.441224		0.659836	0.0583181		0.0658562	0.00383185
1554621_at	0.0146067	0.827664		0.0861629	0.122794		0.0102111	0.802541
1554623_x_at	0.0498636	0.103507		0.202749	0.49867		0.0955206	0.0558164
1554624_a_at	0.0426069	0.329247		0.904978	0.00129973		0.0115943	0.581165
1554625_at	0.0119731	0.229126		0.991691	0.00550327		0.0214419	0.421991
1554627_a_at	0.0307142	0.678195		0.671873	0.00924273		0.174656	0.815833
1554628_at	0.379162	0.0452034		0.0486615	0.0892621		0.00860549	0.404972
1554629_at	0.0124753	0.632259		0.0289195	0.945824		0.010807	0.166279
1554631_at	0.0420639	0.500279		0.256949	0.00729365		0.0464527	0.0228378
1554633_a_at	0.0132283	0.469162		0.122118	0.113012		0.0202701	0.649493
1554634_at	0.032909	0.0683977		0.593832	0.0104139		0.125705	0.0415103
1554635_a_at	0.0622561	0.693173		0.254216	0.0375344		0.125188	0.0108308
1554636_at	0.0178875	0.361029		0.15159	0.671437		0.0294646	0.232523
1554637_a_at	0.997388	0.00138297		0.122055	0.211486		0.103801	0.103533
1554638_at	0.271126	0.188252		0.103694	0.189281		0.10275	0.158898
1554640_at	0.626622	0.024391		0.094312	0.139911		0.515517	0.000388207
1554641_a_at	0.0341933	0.842385		0.59509	8.14581e-05		0.0258478	0.412254
1554642_at	0.0311687	0.343862		0.171557	0.00167375		0.0118486	0.374159
1554643_at	0.018926	0.804036		0.104619	0.0668727		0.0670671	0.133894
1554646_at	0.0360031	0.162066		0.439315	0.000403904		0.014343	0.34105
1554648_a_at	0.987187	0.000633348		0.0772879	0.0173916		0.875624	0.000148131
1554649_at	0.925331	0.00540663		0.0611897	0.0110112		0.0197737	0.501622
1554650_a_at	0.0317368	0.291485		0.286529	0.00436956		0.0117789	0.772864
1554652_s_at	0.191215	0.249131		0.250577	0.107356		0.0243552	0.440852
1554655_a_at	0.0170735	0.53606		0.0515669	0.444786		0.0175903	0.177958
1554657_a_at	0.029712	0.69879		0.0653893	0.10088		0.0146329	0.766437
1554659_at	0.0598373	0.450983		0.115093	0.0963562		0.0347586	0.141419
1554660_a_at	0.0222792	0.0207145		0.0598133	0.00599784		0.0754551	0.395668
1554661_s_at	0.0163402	0.306499		0.0356059	0.72937		0.00438062	0.10647
1554662_at	0.0184385	0.788248		0.673736	0.00932226		0.0125748	0.18406
1554663_a_at	0.0230491	0.866645		0.214269	0.0249874		0.10574	0.147432
1554664_at	0.0358144	0.318438		0.280414	0.0741948		0.0241126	0.297712
1554665_at	0.0231961	0.958408		0.0344757	0.587383		0.027049	0.609886
1554666_at	0.0691243	0.147229		0.319534	0.0158453		0.0850993	0.109719
1554667_s_at	0.0644013	0.180028		0.648328	0.00289134		0.467233	2.22958e-05
1554668_a_at	0.0344241	0.422567		0.639122	0.000365172		0.00908851	0.72452
1554670_at	0.024265	0.489196		0.0422424	0.436945		0.0698629	0.128383
1554671_a_at	0.0132178	0.292803		0.0406914	0.585601		0.271154	0.0329255
1554672_at	0.285847	0.261149		0.420088	0.0566919		0.0122466	0.427764
1554675_a_at	0.0196255	0.880257		0.121259	0.271097		0.0531965	0.291773
1554676_at	0.446077	0.0375423		0.0330424	0.649314		0.00992783	0.776841
1554677_s_at	0.0213113	0.387734		0.0986165	0.328127		0.0133473	0.584931
1554678_s_at	0.364977	0.121358		0.365751	0.00472485		0.419978	0.00252956
1554679_a_at	0.0936191	0.349721		0.106097	0.0860605		0.0427681	9.60018e-05
1554680_s_at	0.0163582	0.195387		0.136441	0.00695306		0.0107344	0.64538
1554681_a_at	0.0565325	0.255047		0.830995	0.546977		0.0243209	0.209827
1554683_a_at	0.0143467	0.688356		0.0340521	0.384341		0.00826887	0.257218
1554685_a_at	0.0171901	0.575908		0.839234	0.00571825		0.0159199	0.767298
1554686_at	0.0108904	0.959981		0.0352984	0.729336		0.0526188	0.0993361
1554689_a_at	0.0915956	0.252688		0.0413012	0.139278		0.161511	0.0691828
1554690_a_at	1	0.000296044		0.0529196	0.158096		0.999997	1.26871e-06
1554691_a_at	0.240163	0.0296732		0.0326424	0.0656381		0.103028	0.00882711
1554692_at	0.140739	0.376526		0.0815368	0.0379168		0.0129848	0.810112
1554694_at	0.0255718	0.603785		0.0705555	0.120008		0.0113175	0.73464
1554696_s_at	0.999019	0.00227704		0.0267919	0.000367236		0.32579	0.299162
1554697_at	0.938631	0.00624708		0.0469534	0.154221		0.0156141	0.439539
1554699_at	0.0286336	0.793672		0.615263	0.0152846		0.0467882	0.416853
1554700_at	0.0104229	0.454146		0.0210264	0.848783		0.0108797	0.739733
1554701_a_at	0.0355054	0.590031		0.210883	0.00235078		0.0265357	0.696882
1554702_at	0.034499	0.51372		0.0482374	0.0312499		0.0167075	0.493523
1554703_at	0.216881	0.182863		0.0658733	0.337798		0.978367	0.0843117
1554704_at	0.0357949	0.671505		0.211148	0.0432108		0.151186	0.3111
1554705_at	0.0171993	0.668263		0.0598647	0.303823		0.0150503	0.357984
1554706_at	0.0139314	0.909737		0.0626873	0.451695		0.0206069	0.717354
1554707_at	0.0305111	0.20344		0.0429825	0.017986		0.0178329	0.557633
1554708_s_at	0.00706693	0.327924		0.357872	0.0717322		0.0397245	0.400889
1554710_at	0.0203938	0.711423		0.039534	0.409985		0.132247	0.10818
1554711_at	0.179582	0.0589786		0.284477	0.214783		0.0125885	0.799619
1554712_a_at	0.0156467	0.472372		0.0567258	0.523187		0.0124209	0.294535
1554714_at	0.0162309	0.913033		0.100192	0.305371		0.0269244	0.335516
1554715_at	0.0254096	0.548921		0.0386704	0.1741		0.0148737	0.394753
1554716_s_at	0.0230253	0.714555		0.147748	0.00815949		0.0169866	0.601762
1554717_a_at	0.0771129	0.586678		0.0444459	0.550818		0.0223262	0.657286
1554719_at	0.015443	0.607631		0.0829191	0.0407742		0.0212433	0.461966
1554721_a_at	0.0240104	0.0388617		0.107751	0.0375957		0.0176778	0.0568812
1554722_at	0.00851553	0.787699		0.0638227	0.158861		0.0105603	0.96706
1554723_x_at	0.0116715	0.37451		0.095526	0.665849		0.454262	0.00217297
1554724_at	0.851129	0.000553656		0.187611	0.00964037		0.0745038	0.0402253
1554725_at	0.0396267	0.545561		0.396873	0.0222634		0.0120774	0.692392
1554726_at	0.0524044	0.775774		0.166548	0.092477		0.0444286	0.0761353
1554728_at	0.0111324	0.462845		0.0496737	0.981595		0.0108095	0.937092
1554730_at	0.022312	0.310208		0.409956	0.163134		0.0137595	0.592734
1554732_at	0.081499	0.321394		0.273854	0.00533976		0.689095	0.00169722
1554733_at	0.022215	0.722659		0.789178	0.016939		0.0137392	0.314611
1554735_a_at	0.0209787	0.444032		0.179822	0.00172952		0.0538291	0.277869
1554736_at	0.0529429	0.473324		0.0381689	0.854073		0.378273	0.0027667
1554737_at	0.0234864	0.760824		0.555453	0.00207339		0.0131482	0.932727
1554739_at	0.219949	0.087241		0.054849	0.378617		0.0734448	0.0511308
1554740_a_at	0.0144989	0.284993		0.0573475	0.170255		0.119502	0.0889151
1554741_s_at	0.0577415	0.366469		0.326156	0.0508643		0.992907	0.000170261
1554742_at	0.105438	0.0199924		0.111939	0.600981		0.0367879	0.407143
1554743_x_at	0.0177814	0.541528		0.0560041	0.222688		0.0147464	0.356253
1554744_at	0.0145131	0.145814		0.0612168	0.716502		0.0106596	0.874732
1554745_at	0.0141961	0.988554		0.249324	0.23782		0.0134687	0.470343
1554747_a_at	0.483839	0.12013		0.0627052	0.0295954		0.62202	0.000130857
1554748_at	0.0231382	0.994698		0.0835094	0.296849		0.0183104	0.668277
1554749_s_at	0.0242963	0.592442		0.0955969	0.0471295		0.00862869	0.955104
1554751_at	0.0120109	0.420987		0.148718	0.125367		0.0154962	0.309656
1554752_a_at	0.0534984	0.419465		0.830951	0.000593066		0.0157837	0.641562
1554755_a_at	0.0202318	0.97996		0.164169	0.00781173		0.709899	0.00126754
1554757_a_at	0.890336	0.0545992		0.0934873	0.0820178		0.0236558	0.43565
1554758_a_at	0.0387123	0.391562		0.165514	0.479		0.0162964	0.825926
1554759_at	0.0800803	0.160973		0.219087	0.131894		0.0194111	0.559197
1554761_a_at	0.716902	0.0427105		0.121446	0.249684		0.0429652	0.00643631
1554762_a_at	0.0174241	0.742467		0.27811	0.0629574		0.453652	0.0517945
1554763_at	0.0247765	0.713641		0.461587	0.15092		0.0177023	0.877593
1554764_a_at	0.0916899	0.153769		0.0435809	0.485744		0.0138653	0.281663
1554765_a_at	0.0230539	0.819434		0.304446	0.0205925		0.0423803	0.470269
1554766_s_at	0.0596845	0.920758		0.0946949	0.11745		0.0153525	0.244818
1554767_s_at	0.0329624	0.392975		0.0373636	0.108296		0.0847174	0.249609
1554768_a_at	0.0365156	0.206248		0.0670358	0.113035		0.02341	0.739357
1554769_at	0.0735491	0.0169203		0.100344	0.095728		0.0192693	0.822513
1554770_x_at	0.0669302	0.0113082		0.103323	0.0129408		0.0207267	0.152226
1554771_at	0.0156481	0.934284		0.0259167	0.172431		0.0214211	0.564544
1554772_at	0.0257051	0.891534		0.0943118	0.0327191		0.0171226	0.190549
1554773_at	0.0213619	0.39191		0.801187	0.0037113		0.019935	0.27014
1554774_at	0.802189	0.013954		0.69604	0.00381485		0.132326	0.0223472
1554776_at	0.00731155	0.281583		0.0281085	0.0337979		0.00873054	0.917312
1554777_at	0.012725	0.407229		0.0284833	0.150221		0.193214	0.0934687
1554778_at	0.166102	0.056142		0.274105	0.237604		0.00685793	0.745693
1554779_s_at	0.0248104	0.094164		0.151997	0.0252679		0.0131582	0.219454
1554780_a_at	0.0558318	0.538047		0.22241	0.634123		0.00912985	0.484083
1554781_at	0.0648458	0.407563		0.143069	0.017406		0.0110907	0.436078
1554782_at	0.0461156	0.317084		0.188843	0.0279904		0.0295599	0.643078
1554783_s_at	0.0197578	0.84294		0.585729	0.514852		0.041234	0.0521196
1554784_at	0.0213188	0.464921		0.0354707	0.0720278		0.0228526	0.462323
1554785_at	0.14004	0.172969		0.212327	0.184153		0.0152494	0.359105
1554786_at	0.0587719	0.0361307		0.0361413	0.808134		0.0171817	0.626376
1554787_at	0.115565	0.103197		0.330949	0.134484		0.032605	0.222353
1554789_a_at	0.0178737	0.815275		0.63628	0.00743625		0.0634228	0.0339376
1554790_at	0.0870209	0.120696		0.69437	0.0174497		0.020357	0.965054
1554791_a_at	0.0220912	0.981149		0.422042	0.041134		0.0287729	0.120124
1554793_at	0.0265521	0.229372		0.0220532	0.814669		0.0130359	0.610007
1554794_a_at	0.0247523	0.00155844		0.243839	0.0491915		0.15551	0.0761849
1554795_a_at	0.0744723	0.491636		0.0785319	0.239458		0.428798	0.187223
1554796_at	0.0589788	0.412558		0.474708	0.00927128		0.0143493	0.882799
1554797_at	0.0218767	0.399748		0.0492914	0.780352		0.0167203	0.578073
1554798_at	0.0134335	0.255766		0.0240921	0.238196		0.0210583	0.406395
1554800_at	0.0315919	0.854981		0.595303	0.000293584		0.0952115	0.0110276
1554801_at	0.0156242	0.582521		0.0516446	0.100445		0.0153626	0.382458
1554803_s_at	0.0202893	0.211185		0.115742	0.565664		0.00654584	0.850297
1554804_a_at	0.0468205	0.260235		0.715681	0.016832		0.225967	0.0462455
1554805_at	0.0223663	0.968891		0.765303	0.00211733		0.0192877	0.786984
1554806_a_at	0.459347	0.000735386		0.117997	0.0383205		0.0056748	0.663084
1554807_a_at	0.0431152	0.656392		0.0647638	0.0169438		0.0177422	0.0448753
1554808_at	0.0210212	0.66975		0.0354268	0.891082		0.0223071	0.714495
1554809_at	0.0157738	0.345574		0.0347893	0.835563		0.00964602	0.599327
1554810_at	0.0410201	0.0623867		0.0439097	0.416811		0.0210474	0.792612
1554812_at	0.0192201	0.891193		0.0304444	0.38139		0.0166724	0.801109
1554813_at	0.0253743	0.0770082		0.174521	0.517215		0.0112799	0.272336
1554814_at	0.0401708	0.160277		0.0363314	0.054942		0.0116311	0.64612
1554816_at	0.06244	0.320835		0.0395315	0.628107		0.0100577	0.557195
1554818_s_at	0.0461269	0.211		0.0286589	0.626034		0.522922	0.0024445
1554819_a_at	0.0144453	0.647158		0.0648083	0.126235		0.0214777	0.294737
1554820_at	0.0370968	0.289332		0.035022	0.855011		0.0198624	0.384858
1554821_a_at	0.892403	0.0100126		0.0500552	0.00996114		0.176507	0.51071
1554822_at	0.136975	0.331637		0.119043	0.114972		0.0208953	0.300689
1554824_at	0.0883814	0.086214		0.122672	0.160104		0.0199778	0.999335
1554825_at	0.0159485	0.236921		0.0989391	0.103783		0.0195441	0.313459
1554826_at	0.0936009	0.165811		0.517423	0.0296415		0.0150672	0.91717
1554827_a_at	0.0435367	0.420512		0.0643834	0.0490623		0.0489511	0.152814
1554828_at	0.0183714	0.649938		0.177083	0.129889		0.122731	0.00938439
1554830_a_at	0.538905	0.335409		0.0437509	0.0432757		0.0262564	0.214765
1554831_x_at	0.0247617	0.90442		0.270649	0.0917657		0.0346322	0.253295
1554833_at	0.022552	0.191432		0.284415	0.0199115		0.0272464	0.184111
1554834_a_at	0.928837	0.0229581		0.138821	0.0106383		0.723915	0.00679032
1554835_a_at	0.0427531	0.479359		0.068901	0.165783		0.0276029	0.371822
1554836_at	0.0616339	0.0843025		0.340113	0.151939		0.0230017	0.256083
1554837_a_at	0.02624	0.63545		0.18491	0.291051		0.126686	0.190215
1554839_at	0.0274031	0.428472		0.431161	0.0356951		0.0244713	0.0847617
1554840_at	0.0161477	0.715107		0.37896	0.143445		0.0568326	0.0786939
1554841_at	0.0177418	0.261571		0.0331975	0.287619		0.0234718	0.151424
1554842_at	0.0130432	0.423844		0.0803776	0.720045		0.0212735	0.269149
1554844_at	0.779498	0.00602602		0.0349472	0.549263		0.00900773	0.973087
1554846_at	0.0447695	0.662652		0.164735	0.255313		0.0136364	0.610294
1554847_at	0.174696	0.104598		0.0379433	0.977781		0.0175641	0.631758
1554849_at	0.115646	0.200017		0.0630831	0.149045		0.0181377	0.437403
1554850_at	0.167587	0.622868		0.291353	0.134266		0.0317286	0.246664
1554852_a_at	0.0671372	0.0316695		0.110261	0.0270124		0.0310525	0.240677
1554853_at	0.0392368	0.11846		0.901089	0.00453571		0.0245327	0.0900623
1554855_at	0.0209999	0.343708		0.156389	0.505647		0.0529823	0.296177
1554857_at	0.0341286	0.709794		0.340767	0.127044		0.0294299	0.276029
1554860_at	0.0251637	0.248092		0.0943775	0.284265		0.0170942	0.454142
1554862_at	0.124047	0.605525		0.125413	0.0160002		0.022415	0.113778
1554863_s_at	0.259238	0.49833		0.385093	0.0697485		0.0170483	0.979777
1554864_a_at	0.161244	0.131223		0.0553389	0.0809704		0.017025	0.461797
1554865_at	0.00874019	0.711005		0.033187	0.612224		0.0136565	0.344926
1554866_at	0.00668693	0.695717		0.0153611	0.926239		0.0101442	0.402933
1554867_a_at	0.0841979	0.130782		0.0347225	0.108853		0.961078	0.000207243
1554868_s_at	0.101775	0.596995		0.0677487	0.0210951		0.476054	0.537287
1554869_at	0.0231257	0.755629		0.168836	0.00873494		0.0172587	0.831912
1554871_at	0.0272913	0.958845		0.0435574	0.0197088		0.0160284	0.581157
1554872_a_at	0.0585628	0.249109		0.360727	0.179495		0.0118043	0.988473
1554873_at	0.020297	0.283223		0.369486	0.0406691		0.157579	0.0182562
1554874_at	0.0717507	0.442057		0.150426	0.182365		0.0387896	0.0544142
1554875_at	0.0401686	0.213495		0.11693	0.0261361		0.148904	0.151598
1554876_a_at	0.027981	0.398972		0.0588951	0.137668		0.00938476	0.544947
1554878_a_at	0.0906684	0.937206		0.187206	0.0220346		0.0144817	0.130687
1554880_at	0.0654579	0.259571		0.812161	0.0111764		0.0189979	0.205794
1554882_at	0.0167172	0.959089		0.116234	0.273701		0.00844822	0.286255
1554883_a_at	0.075639	0.0462112		0.337767	0.00114588		0.112576	0.00591168
1554884_at	0.0158069	0.498861		0.210142	0.100324		0.0135291	0.378699
1554885_a_at	0.318603	0.0944614		0.0737753	0.374461		0.0477915	0.264908
1554886_a_at	0.142935	0.0552763		0.119085	0.100882		0.0291164	0.776611
1554887_at	0.0242824	0.523949		0.0551368	0.709582		0.0122854	0.425002
1554889_at	0.10446	0.267279		0.0348429	0.741513		0.062241	0.556113
1554890_a_at	0.0162245	0.279554		0.0524042	0.0308329		0.0358274	0.107403
1554891_at	0.0718647	0.240687		0.054966	0.513595		0.0256079	0.182503
1554892_a_at	0.0116094	0.70734		0.0455282	0.852521		0.0190576	0.108672
1554894_a_at	0.386967	0.0397718		0.126808	0.47768		0.0187562	0.571708
1554895_a_at	0.759786	0.0132355		0.0705663	0.0113214		0.142485	0.0546362
1554897_s_at	0.86738	0.00116811		0.75241	0.00228323		0.2468	0.00650301
1554899_s_at	0.0226809	0.578906		0.325555	0.000775359		0.0210178	0.608305
1554901_at	0.450099	0.0737358		0.139043	0.126637		0.022154	0.682489
1554903_at	0.177019	0.14197		0.814524	0.000888924		0.0133062	0.596846
1554905_x_at	0.110897	0.0683463		0.952696	0.00120026		0.0155496	0.567562
1554906_a_at	0.0299786	0.282557		0.226274	0.00203638		0.0319654	0.221955
1554907_a_at	0.0188634	0.505422		0.142808	0.25349		0.0277227	0.272561
1554908_at	0.119421	0.179125		0.999461	0.0028608		0.0145186	0.961344
1554909_at	0.0355318	0.319571		0.147057	0.240563		0.0468434	0.323013
1554910_at	0.0101389	0.917757		0.0332434	0.574581		0.0264733	0.120627
1554911_at	0.0411249	0.284798		0.0658624	0.00337723		0.0138159	0.949834
1554912_at	0.387055	0.0522877		0.176771	0.12066		0.762665	0.00608705
1554914_at	0.0341566	0.173553		0.216545	0.704727		0.102396	0.0415715
1554915_a_at	0.0268809	0.858868		0.141927	0.102249		0.162074	0.039878
1554916_a_at	0.129608	0.145415		0.0550606	0.0523641		0.0213279	0.113656
1554918_a_at	0.936205	0.00403494		0.0697775	0.491053		0.594117	0.00114526
1554919_s_at	0.0150881	0.426169		0.55482	0.00250326		0.583725	0.0343981
1554920_at	0.00733418	0.370329		0.0160022	0.432478		0.0164853	0.141887
1554921_a_at	0.224399	0.131052		0.168974	0.530574		0.0200369	0.824449
1554922_at	0.012916	0.947874		0.0302666	0.932475		0.00950165	0.888754
1554923_at	0.00847042	0.761715		0.0231408	0.838083		0.026298	0.351117
1554927_at	0.120856	0.155382		0.0334832	0.431598		0.0221865	0.424705
1554929_at	0.0176464	0.855067		0.161668	0.00915943		0.0200162	0.761124
1554930_a_at	0.00971086	0.402597		0.0924562	0.475034		0.0933037	0.47641
1554931_at	0.0315084	0.729524		0.232309	0.180727		0.0151145	0.720501
1554932_at	0.072593	0.211302		0.313086	0.00428266		0.0145711	0.235793
1554933_at	0.0154881	0.859972		0.195644	0.111844		0.0101005	0.922632
1554934_at	0.0161542	0.648022		0.0772464	0.116295		0.0722839	0.156164
1554937_x_at	0.170691	0.736117		0.561084	0.00575993		0.0984797	0.0115365
1554938_a_at	0.0234112	0.91625		0.129321	0.0970385		0.0134918	0.297697
1554940_a_at	0.0388575	0.570145		0.365794	0.038086		0.0235889	0.314185
1554941_at	0.0177188	0.536605		0.0543014	0.0275476		0.0214266	0.423073
1554942_a_at	0.351771	0.442279		0.185892	0.0358855		0.011353	0.783181
1554943_at	0.0161857	0.7791		0.968113	0.00817003		0.511799	0.00262442
1554945_x_at	0.0462214	0.903216		0.14346	0.0475408		0.326073	0.000489062
1554946_at	0.0189077	0.431504		0.091981	0.296831		0.0450232	0.214283
1554947_at	0.0130276	0.90007		0.110477	0.276687		0.0103718	0.374777
1554948_at	0.0516258	0.376051		0.0649253	0.155857		0.232183	0.377951
1554949_at	0.0172705	0.896013		0.3526	0.0129233		0.0261841	0.156509
1554950_at	0.17891	0.047296		0.32345	0.115555		0.0170054	0.861098
1554951_at	0.0139108	0.663023		0.199602	0.0716296		0.0169549	0.570598
1554952_s_at	0.023738	0.562487		0.0414611	0.00262139		0.0172917	0.500181
1554953_a_at	0.0367502	0.309856		0.0630779	0.129749		0.0393567	0.0679078
1554954_at	0.0517518	0.683203		0.895542	0.0207111		0.0241232	0.7287
1554957_at	0.0318409	0.54563		0.53865	0.128882		0.0652437	0.45248
1554958_at	0.918273	0.0134961		0.0638405	0.218347		0.04281	0.244276
1554960_at	0.0136169	0.622237		0.0416217	0.094116		0.0242496	0.305
1554961_at	0.0338017	0.619489		0.08233	0.0513626		0.0156279	0.392895
1554962_a_at	0.0597811	0.275481		0.330888	0.0906341		0.0321488	0.285503
1554963_at	0.0344652	0.822715		0.0410361	0.0496167		0.00800958	0.562257
1554964_x_at	0.0128207	0.790072		0.204177	0.187126		0.00879916	0.33969
1554965_at	0.0230122	0.29258		0.486605	0.174557		0.0104446	0.938403
1554966_a_at	0.781376	0.0110965		0.388195	0.00105365		0.203405	0.0106104
1554967_at	0.0199326	0.18176		0.466751	0.0724348		0.00875641	0.685181
1554969_x_at	0.0114277	0.226713		0.513621	0.0185368		0.0641011	0.0609726
1554970_at	0.0130343	0.998123		0.046779	0.0357205		0.0475345	0.0923422
1554971_at	0.0117004	0.790448		0.0532848	0.136252		0.0108581	0.382981
1554972_at	0.0117155	0.827811		0.312086	0.0458694		0.0132712	0.775603
1554973_a_at	0.0114088	0.572722		0.0389399	0.432358		0.00959136	0.170968
1554974_at	0.023147	0.854952		0.763374	0.00496598		0.0121987	0.154971
1554976_a_at	0.0256917	0.600852		0.56979	0.0121236		0.0128582	0.195589
1554977_at	0.304229	0.0517754		0.133874	0.388105		0.303462	0.0103611
1554978_at	0.0364971	0.145804		0.0775572	0.687242		0.0174895	0.596891
1554980_a_at	0.023029	0.507573		0.0618347	0.271672		0.278213	0.00340895
1554981_at	0.0386818	0.0352224		0.0370196	0.115525		0.0954683	0.0101697
1554982_a_at	0.011439	0.476208		0.0726424	0.175603		0.00918593	0.10422
1554983_at	0.0366419	0.117409		0.398419	0.116638		0.0210518	0.223264
1554984_a_at	0.0178768	0.863106		0.484927	0.06403		0.016221	0.64321
1554985_at	0.00617255	0.375484		0.0164024	0.528341		0.0168958	0.898005
1554986_a_at	0.0150698	0.4692		0.0288833	0.912673		0.00966402	0.114851
1554987_at	0.0552566	0.309331		0.142329	0.050006		0.0218957	0.510007
1554988_at	0.178001	0.139383		0.0967235	0.65951		0.0172348	0.584446
1554989_at	0.0940364	0.207665		0.800108	0.00695694		0.0157272	0.840377
1554992_at	0.0329064	0.499368		0.112688	0.00216379		0.143202	0.0257951
1554994_at	0.0200525	0.77387		0.0767158	0.0669062		0.0137421	0.670801
1554996_at	0.029503	0.927547		0.602203	0.0231058		0.0196311	0.784343
1554997_a_at	0.546374	0.00698409		0.17194	0.00549132		0.827623	0.000180548
1554999_at	0.0891627	0.0674801		0.128959	0.216713		0.0716706	0.523828
1555000_at	0.188276	0.0232141		0.545614	0.0173484		0.0290592	0.715296
1555001_at	0.362878	0.00177303		0.510804	0.0359632		0.0196052	0.50627
1555002_at	0.0190653	0.0282427		0.481167	0.436808		0.024959	0.0422646
1555003_at	0.0178421	0.44372		0.0926337	0.291505		0.162826	0.0122724
1555004_a_at	0.522555	0.0545399		0.0411456	0.27396		0.0139348	0.461222
[truncated: 52,515 more rows]
